# Supplementary material for: Identification of Epigenetic Interactions between MicroRNA and DNA Methylation Associated with Polycystic Ovarian Syndrome
Source: Preprints.org preprint supplement (doi:10.20944/preprints201910.0191.v1), 2019-10-17
Supplement: Supplementary file 1 [file Table S1 Primer Sequence.xlsx]

## Sheet: Sheet1
Primer		Sequence
Gene	ACTB F	GGACTTCGAGCAAGAGATGG
	ACTB R	AGCACTGTGTTGGCGTACAG
	ATP2A3 F	AGTGCTCCGAAGACAACCC
	ATP2A3 R	GTTCTCCGAGACGCTGTTG
	BRD3 F	ACCACTTCCCGAGCTTATGTG
	BRD3 R	TGCATCTCTGCGACTGTGTG
	BRICD5 F	ACAAGGGACGCAGACAATCG
	BRICD5 R	TTGGTCTTCACCCCTGTAGGC
	ITGAX F	CTCAGAGCTCCACATCTGACC
	ITGAX R	GAGAAGTTGCTAAGGCTGTGA
	MAPK14 F	TTATGCGTCTGACAGGAACACC
	MAPK14 R	AGTCGACAGCCAGGGGATTG
	PRND F	GAGAGAGCCAAGGTTCTGACG
	PRND R	GCCTTCCGGTTCCACTTGAT
	SLC7A5 F	GCACACTGCTCGCTGGG
	SLC7A5 R	CGCCTCTTCCTTCTCCTCG
	VCL F	CGTCCGGGTTGGAAAAGAGA
	VCL R	CATCTGAGCTGCCTGGACAA
	XIAP F	CAGAGCGGAGTTGGCATTTC
	XIAP R	TTGTCCACCTTTTCGCGCC
miRNA	miR-10a-5p F	GGGTACCCTGTAGATCCGAA
	miR-10a-5p RT	GTCGTATCCAGTGCGTGTCGTGGAGTCGGCAATTGCACTGGATACGACCACAAA
	miR-126-3p F	GGGTCGTACCGTGAGTAAT
	miR-126-3p RT	GTCGTATCCAGTGCGTGTCGTGGAGTCGGCAATTGCACTGGATACGACCGCATT
	miR-141-3p F	GGGTAACACTGTCTGGTAA
	miR-141-3p RT	GTCGTATCCAGTGCGTGTCGTGGAGTCGGCAATTGCACTGGATACGACCCATCT
	miR-196-5p F	GGGTAGGTAGTTTCATGTT
	miR-196-5p RT	GTCGTATCCAGTGCGTGTCGTGGAGTCGGCAATTGCACTGGATACGACCCCAAC
	miR-2355-5p F	GGGATCCCCAGATACAAT
	miR-2355-5p RT	GTCGTATCCAGTGCGTGTCGTGGAGTCGGCAATTGCACTGGATACGACTTGTCC
	miR-429 F	GGGTAATACTGTCTGGTAA
	miR-429 RT	GTCGTATCCAGTGCGTGTCGTGGAGTCGGCAATTGCACTGGATACGACACGGTT
	miR-451a F	GGGAAACCGTTACCATTAC
	miR-451a RT	GTCGTATCCAGTGCGTGTCGTGGAGTCGGCAATTGCACTGGATACGACAACTCA
	miR-877-5p F	GUAGAGGAGAUGGCGCAGGG
	miR-877-5p RT	GTCGTATCCAGTGCGTGTCGTGGAGTCGGCAATTGCACTGGATACGACCCCTGC
	U6 F	CTCGCTTCGGCAGCACA
	U6 RT	AACGCTTCACGAATTTGCGT
	Universal R	CAGTGCGTGTCGTGGAGT
