# Supplementary material for: Identification of Epigenetic Interactions between MicroRNA and DNA Methylation Associated with Polycystic Ovarian Syndrome
Source: Preprints.org preprint supplement (doi:10.20944/preprints201910.0191.v1), 2019-10-17
Supplement: Supplementary file 2 [file Table S2 Sequencing data information.xlsx]

## Sheet: RNA-seq
Sample	Total Clean Reads	Mapped Reads	Mapped Ratio	Uniqed Mapped Reads	Uniqed Mapped Ratio
P16	12805208	9153436	0.7148	7532004	0.5882
P15	21569391	18454168	0.8556	15463580	0.7169
P14	25211131	23197672	0.9201	19867396	0.788
P-Mean	19861910	16935092	0.830167	14287660	0.6977
N25	25046372	22283734	0.8897	19398489	0.7745
N21	25070061	22804400	0.9096	19954784	0.796
N20	21088160	17994176	0.8533	15341290	0.7275
N-Mean	2.37349e+07	2.10274e+07	0.8842	18231521	0.766

## Sheet: miRNA-seq
Map to genome
Sample	Total Clean Reads	Mapped Reads	Mapped Ratio	Uniqed Mapped Reads	Uniqed Mapped Ratio
P1	2679848	2508138	0.9359	1151680	0.4298
P2	12412982	12183203	0.9815	5482820	0.4417
P3	2227745	2101716	0.9434	876258	0.3933
P4	3666526	3624483	0.9885	1540881	0.4203
P5	2460160	2404497	0.9774	1191626	0.4844
P-Mean	4.68945e+06	4.56441e+06	0.96534	2048653	0.4339
N1	8665286	8382752	0.9674	4501328	0.5195
N2	3668936	3465350	0.9445	1618871	0.4412
N3	3308140	3184167	0.9625	1557884	0.4709
N4	3522687	3458171	0.9817	1323030	0.3756
N5	2477809	2427198	0.9796	1320140	0.5328
N-Mean	4.32857e+06	4.18353e+06	0.96714	2.06425e+06	0.468
Map to mature miRNA sequence
Sample	Total Clean Reads	Mapped Reads	Mapped Ratio	Uniqed Mapped Reads	Uniqed Mapped Ratio
P1	2679848	1211661	0.4521	875280	0.3266
P2	12412982	8275438	0.6667	7206008	0.5805
P3	2227745	1010835	0.4537	749097	0.3363
P4	3666526	2263151	0.6172	1818996	0.4961
P5	2460160	1165768	0.4739	896112	0.3642
P-Mean	4.68945e+06	2.78537e+06	0.53272	2.3091e+06	0.42074
N1	8665286	4044422	0.4667	3050006	0.352
N2	3668936	1705325	0.4648	1337579	0.3646
N3	3308140	1671125	0.5052	1229701	0.3717
N4	3522687	2058228	0.5843	1668472	0.4736
N5	2477809	1360788	0.5492	1028430	0.4151
N-Mean	4.32857e+06	2.16798e+06	0.51404	1.66284e+06	0.3954

## Sheet: MBD-seq
Mapped Ratio of MBD library
Sample	P1	P2	P3	N1	N2	N3
Total Clean Reads	32049917	61046525	36977688	28111810	86238162	31048723
Mapped Reads	24677688	40456679	32163836	20767782	56189866	26164667
Mapped Ratio	0.77	0.6627	0.8698	0.7388	0.6516	0.8427
Uniqed Mapped Reads	19467649	29522707	24391305	16909527	45421777	20823759
Uniqed Mapped Ratio	0.6074	0.4836	0.6596	0.6015	0.5267	0.6707
Mapped Ratio of Input library
Sample	P1	P2	P3	N1	N2	N3
Total Clean Reads	26380353	28960402	25383804	27385766	28316130	25814278
Mapped Reads	21738912	20663478	22478738	21836164	20937377	23825900
Mapped Ratio	0.8241	0.7135	0.8856	0.7974	0.7394	0.923
Uniqed Mapped Reads	18963587	17978422	19617463	18943293	18286485	20772313
Uniqed Mapped Ratio	0.7189	0.6208	0.7728	0.6917	0.6458	0.8047
