# Supplementary material for: Identification of Epigenetic Interactions between MicroRNA and DNA Methylation Associated with Polycystic Ovarian Syndrome
Source: Preprints.org preprint supplement (doi:10.20944/preprints201910.0191.v1), 2019-10-17
Supplement: Supplementary file 3 [file Table S3 Differently expressed genes.xlsx]

## Sheet: Sheet 1
ENSEMBL	ENTREZID	SYMBOL	logFC	logCPM	LR	PValue	FDR
ENSG00000000938	2268	FGR	3.2	2.20345	15.4744	8.36294e-05	0.0310159
ENSG00000004534	10180	RBM6	-1.03009	6.69319	6.25457	0.0123874	0.413916
ENSG00000005379	9256	TSPOAP1	-1.27845	2.62562	4.58849	0.0321874	0.605164
ENSG00000006194	10127	ZNF263	-1.21276	4.77769	7.97283	0.00474845	0.274429
ENSG00000007392	55692	LUC7L	-1.11859	5.92142	8.56089	0.00343462	0.23448
ENSG00000007516	8938	BAIAP3	-1.94307	2.38919	8.34839	0.00386029	0.247601
ENSG00000008128	728642	CDK11A	-1.17803	5.88465	6.56497	0.0104005	0.384782
ENSG00000008516	64386	MMP25	3.00159	2.95449	19.2586	1.14155e-05	0.00926853
ENSG00000009950	51085	MLXIPL	-2.72166	3.55954	9.11804	0.00253101	0.203506
ENSG00000010327	23166	STAB1	3.06725	3.44308	10.5322	0.00117314	0.134201
ENSG00000010803	22955	SCMH1	1.09111	5.80331	5.309	0.0212155	0.523054
ENSG00000011243	26993	AKAP8L	-1.50056	7.12233	7.33835	0.00674986	0.317816
ENSG00000011347	9066	SYT7	-1.02887	4.36209	4.84322	0.027755	0.576498
ENSG00000011600	7305	TYROBP	2.23372	2.21869	7.23725	0.00714062	0.327699
ENSG00000013573	1663	DDX11	1.70197	2.57929	7.06125	0.0078769	0.341424
ENSG00000015285	7454	WAS	1.98851	2.00753	6.73735	0.00944148	0.366764
ENSG00000018280	6556	SLC11A1	2.63677	2.75284	13.6279	0.000222854	0.0526141
ENSG00000025293	51230	PHF20	-1.04305	5.83157	4.83629	0.0278667	0.576748
ENSG00000026036	100533107	RTEL1-TNFRSF6B	-1.16834	4.46965	4.42209	0.0354766	0.626183
ENSG00000027869	9047	SH2D2A	-1.73742	1.92305	4.27099	0.0387684	0.643992
ENSG00000028137	7133	TNFRSF1B	1.9016	3.6856	9.56376	0.00198456	0.178625
ENSG00000028310	65980	BRD9	-1.43609	6.30315	6.93176	0.00846784	0.350604
ENSG00000030066	23279	NUP160	1.1092	4.01687	3.98969	0.0457795	0.661347
ENSG00000035403	7414	VCL	1.6682	8.18774	15.0637	0.00010394	0.0343639
ENSG00000036054	55773	TBC1D23	1.03877	4.71469	5.92184	0.0149543	0.446871
ENSG00000038002	175	AGA	1.09393	3.29491	4.51472	0.0336045	0.612936
ENSG00000041988	90326	THAP3	-1.83643	4.57978	8.58497	0.00338948	0.233125
ENSG00000042832	7038	TG	-1.80802	1.74087	7.18907	0.0073349	0.329516
ENSG00000043462	3937	LCP2	4.55	1.60074	15.1371	9.99795e-05	0.0336184
ENSG00000050405	51474	LIMA1	1.26591	4.91137	7.41283	0.00647602	0.314333
ENSG00000054356	5798	PTPRN	-1.31262	7.27572	6.26773	0.0122956	0.41261
ENSG00000056998	8908	GYG2	-1.46637	3.82272	7.23323	0.00715663	0.327699
ENSG00000058404	816	CAMK2B	-1.72152	2.99016	6.54687	0.0105069	0.386002
ENSG00000059377	6916	TBXAS1	1.95121	0.868092	4.66697	0.0307482	0.593994
ENSG00000062282	84649	DGAT2	1.27944	2.30112	4.38273	0.0363048	0.628443
ENSG00000063180	770	CA11	-1.37872	3.10393	6.68032	0.0097483	0.37087
ENSG00000063322	55588	MED29	-2.32965	5.07923	11.6163	0.000653764	0.0950356
ENSG00000065060	54887	UHRF1BP1	1.10615	4.65148	6.48973	0.0108499	0.392965
ENSG00000065154	4942	OAT	1.028	4.25845	5.09873	0.0239433	0.548166
ENSG00000065923	84679	SLC9A7	-1.44962	3.8337	6.10085	0.0135117	0.431844
ENSG00000066336	6688	SPI1	2.89336	2.92121	15.011	0.000106885	0.0343639
ENSG00000066557	55631	LRRC40	1.17	2.50513	3.9242	0.0475959	0.661347
ENSG00000066735	26153	KIF26A	-1.97958	5.42648	6.1077	0.0134594	0.431428
ENSG00000069696	1815	DRD4	-1.3105	2.25507	4.25964	0.0390282	0.645731
ENSG00000070269	54916	TMEM260	1.18657	2.73876	3.93708	0.0472326	0.661347
ENSG00000070814	6949	TCOF1	-1.47637	6.93198	7.58352	0.00589042	0.303707
ENSG00000071242	6196	RPS6KA2	-1.16923	5.37227	6.72102	0.00952833	0.366764
ENSG00000071246	22846	VASH1	-1.53354	8.08747	9.55614	0.00199282	0.178625
ENSG00000072163	55679	LIMS2	-1.72762	5.55307	10.4825	0.00120507	0.135526
ENSG00000073737	10170	DHRS9	1.52621	5.11741	7.09834	0.00771553	0.339738
ENSG00000074317	6620	SNCB	-3.23485	0.799717	8.06832	0.00450458	0.265886
ENSG00000074370	489	ATP2A3	-2.24326	4.95996	16.2493	5.55307e-05	0.0246475
ENSG00000075391	9462	RASAL2	1.13995	5.41918	5.8681	0.0154177	0.452627
ENSG00000076344	8786	RGS11	-1.73372	2.7653	8.4594	0.00363162	0.239887
ENSG00000076351	113235	SLC46A1	-1.02378	4.07435	3.96564	0.0464379	0.661347
ENSG00000077238	3566	IL4R	-2.2897	5.31403	12.2945	0.000454298	0.0788208
ENSG00000077984	8530	CST7	6.9309	0.701484	22.472	2.13229e-06	0.00322644
ENSG00000078124	55331	ACER3	-1.65428	3.0364	4.42422	0.0354323	0.625732
ENSG00000078687	57690	TNRC6C	-1.22112	4.45865	4.78896	0.0286427	0.582296
ENSG00000078804	58476	TP53INP2	-1.19496	7.8504	6.40335	0.0113906	0.399558
ENSG00000079156	114880	OSBPL6	-1.77963	4.34907	5.51424	0.0188622	0.496444
ENSG00000079435	3991	LIPE	-1.04988	6.63998	6.25323	0.0123967	0.413916
ENSG00000081041	2920	CXCL2	2.07447	1.835	4.76696	0.029011	0.583776
ENSG00000081237	5788	PTPRC	4.58407	2.71616	25.9425	3.51748e-07	0.000975777
ENSG00000081985	3595	IL12RB2	2.10734	1.83489	8.85369	0.00292497	0.217829
ENSG00000082258	905	CCNT2	1.30223	3.12402	5.039	0.0247827	0.554431
ENSG00000083782	1833	EPYC	-1.83025	2.65358	6.8581	0.00882404	0.357179
ENSG00000084110	3034	HAL	-2.58539	2.47152	7.36449	0.00665246	0.316572
ENSG00000084628	79570	NKAIN1	-1.47456	8.00018	5.71277	0.0168419	0.47469
ENSG00000085265	2219	FCN1	3.30826	3.20086	13.2459	0.000273172	0.0590055
ENSG00000086506	3049	HBQ1	3.06771	-0.164115	4.55956	0.0327355	0.606563
ENSG00000087085	43	ACHE	-1.00578	3.51544	4.36509	0.0366825	0.630225
ENSG00000087250	4504	MT3	-2.10156	6.87948	10.5655	0.00115215	0.132255
ENSG00000088826	54498	SMOX	-1.13507	4.63918	4.67648	0.0305784	0.593418
ENSG00000089692	3902	LAG3	-1.40519	2.55029	4.24238	0.0394268	0.646541
ENSG00000090382	4069	LYZ	3.17052	3.0853	11.011	0.000905709	0.116824
ENSG00000091428	11069	RAPGEF4	1.02073	5.74358	5.19204	0.0226905	0.537145
ENSG00000092098	55072	RNF31	-1.00635	4.23307	3.92002	0.0477144	0.661347
ENSG00000095637	10580	SORBS1	1.02178	4.99512	4.22359	0.0398657	0.649456
ENSG00000099251	158160	HSD17B7P2	-1.39017	2.89996	5.0443	0.0247071	0.554228
ENSG00000099337	9424	KCNK6	-2.26986	6.31318	12.593	0.000387192	0.0718416
ENSG00000099625	255057	CBARP	-1.17267	5.22151	7.28304	0.00696086	0.32318
ENSG00000099849	8045	RASSF7	-1.46891	4.00177	6.21392	0.012675	0.419482
ENSG00000099985	5008	OSM	2.48813	1.45941	6.00585	0.0142585	0.436663
ENSG00000100055	27128	CYTH4	3.09797	2.26608	13.0378	0.000305262	0.0639112
ENSG00000100344	80339	PNPLA3	-1.47675	3.48491	5.21192	0.0224326	0.535695
ENSG00000100365	4689	NCF4	2.14692	1.70694	5.68806	0.0170808	0.476715
ENSG00000100372	10478	SLC25A17	1.06102	4.11385	5.62778	0.017678	0.484349
ENSG00000100376	55007	FAM118A	-1.13656	3.73666	4.74987	0.0293004	0.585442
ENSG00000100416	55687	TRMU	-1.04593	4.81923	4.96703	0.025835	0.56354
ENSG00000100503	51199	NIN	1.0607	3.24926	4.07429	0.0435406	0.659947
ENSG00000100567	5684	PSMA3	1.00782	4.69732	5.4814	0.0192199	0.498305
ENSG00000100664	1983	EIF5	-1.384	6.30658	12.8857	0.000331098	0.0663972
ENSG00000100823	328	APEX1	1.72583	5.26495	17.7572	2.50965e-05	0.0144041
ENSG00000100890	9692	KIAA0391	1.13193	4.32214	5.30529	0.0212608	0.523054
ENSG00000101132	5203	PFDN4	1.07769	2.93941	4.14505	0.0417564	0.655415
ENSG00000101210	1917	EEF1A2	-1.67259	5.69641	13.8121	0.000202027	0.0512155
ENSG00000101255	57761	TRIB3	-1.02388	3.76904	4.54654	0.0329853	0.607664
ENSG00000101335	10398	MYL9	-1.25278	8.53758	5.31899	0.0210942	0.522087
ENSG00000101336	3055	HCK	3.60372	2.19434	15.6797	7.50254e-05	0.0304278
ENSG00000101460	84557	MAP1LC3A	-1.01319	5.95731	6.88287	0.00870257	0.356475
ENSG00000101463	79953	SYNDIG1	-1.10486	3.90168	4.75064	0.0292875	0.585442
ENSG00000101966	331	XIAP	2.20225	4.32235	13.5262	0.000235252	0.0540089
ENSG00000102109	27344	PCSK1N	-1.24603	4.12927	6.07386	0.0137197	0.434867
ENSG00000102230	9468	PCYT1B	-1.54651	5.25147	6.9601	0.00833472	0.349
ENSG00000102554	688	KLF5	1.17092	3.24719	3.8992	0.0483091	0.661347
ENSG00000102802	84935	MEDAG	-1.54303	2.19911	4.71629	0.0298781	0.589477
ENSG00000102878	3299	HSF4	-1.33068	2.50395	5.128	0.0235429	0.543862
ENSG00000102879	11151	CORO1A	3.48171	3.49403	15.5696	7.95222e-05	0.0304278
ENSG00000102890	79767	ELMO3	-1.67981	2.03677	6.36184	0.01166	0.403556
ENSG00000102924	869	CBLN1	-2.00795	4.86096	10.6865	0.00107922	0.128307
ENSG00000103064	9057	SLC7A6	1.44896	2.53428	4.03184	0.0446492	0.661347
ENSG00000103154	54550	NECAB2	-1.01711	8.151	5.0512	0.0246089	0.553517
ENSG00000103257	8140	SLC7A5	1.22696	8.65807	5.37035	0.0204819	0.518101
ENSG00000103269	9028	RHBDL1	-1.90537	1.50527	6.28308	0.0121896	0.411123
ENSG00000103485	23475	QPRT	-2.01925	5.34287	7.32472	0.00680124	0.319332
ENSG00000103569	366	AQP9	4.37472	2.52269	31.0163	2.55875e-08	0.000121683
ENSG00000103811	1512	CTSH	1.87561	2.3341	5.95012	0.0147163	0.442938
ENSG00000103852	64927	TTC23	-1.35556	3.53246	5.52523	0.0187442	0.496399
ENSG00000104218	79848	CSPP1	-1.60138	4.84151	6.1436	0.0131889	0.427501
ENSG00000104415	8840	CCN4	-1.60443	6.57471	9.68082	0.00186201	0.173141
ENSG00000104894	951	CD37	3.88869	1.19123	12.5492	0.000396386	0.0718416
ENSG00000104903	4066	LYL1	2.23211	1.56063	7.53161	0.00606257	0.30749
ENSG00000105048	7138	TNNT1	-1.54914	5.15748	6.8222	0.00900318	0.359792
ENSG00000105643	27106	ARRDC2	-1.20343	5.11251	9.03118	0.00265413	0.20729
ENSG00000105649	5864	RAB3A	-1.1462	2.37935	3.85561	0.0495798	0.661347
ENSG00000105696	25789	TMEM59L	-1.33618	2.16687	4.06523	0.0437747	0.661347
ENSG00000105963	11033	ADAP1	-1.4764	3.68752	5.08613	0.024118	0.549352
ENSG00000106133	260294	NSUN5P2	-1.77366	3.96214	8.78007	0.00304539	0.2233
ENSG00000106261	7586	ZKSCAN1	-1.00915	6.97	5.68199	0.0171399	0.477074
ENSG00000106327	7036	TFR2	-1.52826	2.48815	5.00411	0.0252872	0.557106
ENSG00000106346	84132	USP42	-1.39879	5.3338	7.57132	0.00593042	0.304511
ENSG00000106443	9678	PHF14	-1.60447	6.40054	7.22824	0.00717655	0.327709
ENSG00000106991	2022	ENG	1.80957	1.80985	5.30089	0.0213145	0.523646
ENSG00000106992	203	AK1	-1.53789	4.35837	5.90019	0.0151393	0.449573
ENSG00000107140	7016	TESK1	-1.04365	5.92937	7.38475	0.00657792	0.316572
ENSG00000107147	57582	KCNT1	-2.07518	2.76096	8.79022	0.00302849	0.223043
ENSG00000107281	56654	NPDC1	-1.45013	4.71247	8.49556	0.00356014	0.238123
ENSG00000107317	5730	PTGDS	-1.75294	2.1757	7.93506	0.0048486	0.277806
ENSG00000107738	64115	VSIR	1.67044	4.07108	7.85564	0.00506624	0.280595
ENSG00000108515	2027	ENO3	-1.36644	2.50452	4.16696	0.0412198	0.655349
ENSG00000108691	6347	CCL2	2.35937	0.725058	4.40927	0.0357441	0.627026
ENSG00000108848	51747	LUC7L3	-2.59619	9.10687	9.00554	0.00269163	0.207411
ENSG00000109084	27346	TMEM97	-1.30644	5.34221	7.0294	0.00801823	0.345303
ENSG00000109099	5376	PMP22	1.2525	4.65245	6.45633	0.0110558	0.39372
ENSG00000109758	3083	HGFAC	-1.62863	1.4479	5.05151	0.0246044	0.553517
ENSG00000109881	91057	CCDC34	-1.55671	3.90334	4.90473	0.0267832	0.568251
ENSG00000110002	4013	VWA5A	1.08198	3.34563	4.12667	0.0422124	0.655415
ENSG00000110429	26273	FBXO3	1.08772	4.15811	4.74428	0.0293958	0.585882
ENSG00000110799	7450	VWF	-1.97658	4.00886	6.45645	0.0110551	0.39372
ENSG00000110811	10536	P3H3	-1.88169	2.57458	10.7418	0.00104745	0.125663
ENSG00000111057	3875	KRT18	1.19092	4.36163	5.80159	0.0160117	0.459891
ENSG00000111344	8437	RASAL1	-2.6504	4.67255	11.6825	0.000630921	0.0938365
ENSG00000111348	397	ARHGDIB	2.88943	2.92513	14.1906	0.000165195	0.0458264
ENSG00000111540	5869	RAB5B	-1.54423	5.22814	6.02883	0.0140741	0.436431
ENSG00000111728	6489	ST8SIA1	-1.34162	3.73478	5.67028	0.0172547	0.479074
ENSG00000111913	9750	RIPOR2	3.62308	2.0029	12.2548	0.000464075	0.0796319
ENSG00000112062	1432	MAPK14	1.36465	5.74907	9.70774	0.00183493	0.172065
ENSG00000112096	6648	SOD2	1.05284	5.62644	7.05218	0.00791688	0.342396
ENSG00000112249	10973	ASCC3	1.00806	6.56768	6.11857	0.0133769	0.430415
ENSG00000112303	8875	VNN2	3.67784	1.60748	16.2855	5.448e-05	0.0245079
ENSG00000112320	55084	SOBP	-1.1715	5.93739	6.80447	0.00909297	0.361644
ENSG00000112541	10846	PDE10A	-1.83841	3.78109	5.50719	0.0189384	0.496976
ENSG00000112562	64094	SMOC2	-1.21882	7.25509	6.15275	0.0131208	0.426109
ENSG00000113070	1839	HBEGF	2.21619	2.35354	8.52514	0.00350274	0.23748
ENSG00000113369	57561	ARRDC3	1.05605	5.79567	5.57975	0.0181693	0.491737
ENSG00000113552	10007	GNPDA1	1.06842	4.99244	4.33411	0.037356	0.636646
ENSG00000113739	8614	STC2	-1.9421	4.18642	6.69647	0.00966041	0.369395
ENSG00000114268	5210	PFKFB4	-1.74457	6.5004	14.974	0.000109001	0.0345574
ENSG00000114270	1294	COL7A1	-1.10549	4.98906	5.38526	0.0203076	0.517229
ENSG00000115155	9381	OTOF	-1.28012	6.55268	7.27418	0.00699528	0.323553
ENSG00000115257	54760	PCSK4	-1.1042	3.46632	4.37925	0.036379	0.628443
ENSG00000115415	6772	STAT1	1.14201	5.71435	8.14079	0.00432805	0.261944
ENSG00000115421	64895	PAPOLG	1.36523	3.04392	3.92249	0.0476444	0.661347
ENSG00000115956	5341	PLEK	3.78921	1.93853	12.5894	0.00038795	0.0718416
ENSG00000115977	22848	AAK1	-1.0369	6.61162	5.26176	0.0217989	0.528822
ENSG00000116017	1820	ARID3A	-1.39247	4.34198	6.76704	0.00928565	0.363659
ENSG00000116117	117583	PARD3B	-2.0763	3.62862	8.57236	0.00341304	0.234261
ENSG00000116701	4688	NCF2	4.4465	2.53675	19.6862	9.12596e-06	0.00839247
ENSG00000116754	9295	SRSF11	-1.90397	7.7816	8.02501	0.00461357	0.268968
ENSG00000116791	1429	CRYZ	1.39325	3.05964	5.2156	0.0223851	0.535328
ENSG00000116883		AL591845.1	-1.55229	2.68588	4.80044	0.0284524	0.581432
ENSG00000116977	3964	LGALS8	1.62701	5.28649	11.1817	0.000826069	0.111332
ENSG00000117069	81849	ST6GALNAC5	2.35435	2.14577	6.64779	0.0099279	0.375984
ENSG00000117151	1486	CTBS	1.2817	3.60634	5.01004	0.0252007	0.556494
ENSG00000117152	5999	RGS4	1.11138	4.47876	4.6618	0.0308409	0.593994
ENSG00000117480	2166	FAAH	-1.56568	2.5813	6.15142	0.0131306	0.426109
ENSG00000117523	23215	PRRC2C	-1.96837	9.37929	7.01103	0.00810091	0.347514
ENSG00000118515	6446	SGK1	1.10226	8.17218	4.88871	0.0270328	0.570998
ENSG00000118965	57539	WDR35	1.389	3.41048	4.97424	0.0257275	0.56308
ENSG00000119285	55127	HEATR1	1.0615	5.01876	5.9041	0.0151057	0.448976
ENSG00000119535	1441	CSF3R	3.37208	4.38574	35.609	2.41167e-09	2.00705e-05
ENSG00000119686	55640	FLVCR2	1.16812	5.67371	4.57486	0.0324444	0.605274
ENSG00000119707	58517	RBM25	-2.35231	8.32833	9.42237	0.00214354	0.184861
ENSG00000119912	3416	IDE	1.11481	3.59315	4.66977	0.0306981	0.593994
ENSG00000120526	84955	NUDCD1	1.24463	3.35429	5.39971	0.0201401	0.51421
ENSG00000120708	7045	TGFBI	3.04449	3.07421	9.86253	0.00168679	0.166622
ENSG00000120899	2185	PTK2B	1.67854	3.83942	9.19648	0.00242482	0.199178
ENSG00000121207	9227	LRAT	-1.29832	6.29612	7.72974	0.00543185	0.291177
ENSG00000121851	84265	POLR3GL	-1.1306	4.93389	4.41748	0.0355724	0.627026
ENSG00000122877	1959	EGR2	1.40846	6.14179	10.0463	0.00152654	0.155416
ENSG00000123146	976	ADGRE5	2.26459	3.35921	6.20104	0.0127675	0.420393
ENSG00000123200	23091	ZC3H13	-1.24573	7.58008	4.72979	0.0296446	0.586867
ENSG00000123329	64333	ARHGAP9	1.40192	3.70197	6.44946	0.0110986	0.394104
ENSG00000123560	5354	PLP1	1.08624	5.98648	7.0992	0.00771184	0.339738
ENSG00000123595	9367	RAB9A	1.21537	4.01973	6.64485	0.00994426	0.376176
ENSG00000123636	29994	BAZ2B	-1.44633	5.56029	4.74299	0.0294178	0.585882
ENSG00000123975	1164	CKS2	1.31037	4.20786	8.23236	0.004115	0.256015
ENSG00000124006	23363	OBSL1	-1.04599	9.12081	4.68175	0.0304846	0.593418
ENSG00000124107	6590	SLPI	8.34279	-0.389159	20.9887	4.62001e-06	0.00531978
ENSG00000124126	57580	PREX1	1.38153	3.56883	5.96363	0.014604	0.442358
ENSG00000124731	54210	TREM1	3.67321	2.63472	21.0175	4.55119e-06	0.00531978
ENSG00000124749	81578	COL21A1	1.72361	3.38403	9.04988	0.00262712	0.206747
ENSG00000125351	65109	UPF3B	-2.07723	5.16137	9.09679	0.00256059	0.204411
ENSG00000125844	6238	RRBP1	-1.06276	8.25573	4.78772	0.0286634	0.582296
ENSG00000125954	100529261	CHURC1-FNTB	9.63922	0.820221	21.8403	2.96308e-06	0.0042886
ENSG00000126264	10870	HCST	2.23012	0.381818	4.02713	0.044774	0.661347
ENSG00000126759	5199	CFP	-1.44999	4.1868	7.19605	0.00730642	0.329197
ENSG00000126870	55112	WDR60	-1.17951	6.72105	4.86233	0.0274492	0.573568
ENSG00000126903	8273	SLC10A3	-1.34809	4.476	9.02077	0.00266929	0.207388
ENSG00000127586	63922	CHTF18	-1.55421	4.68669	8.63449	0.00329857	0.22972
ENSG00000128274	53947	A4GALT	-1.07142	4.56631	5.12561	0.0235753	0.543866
ENSG00000128340	5880	RAC2	3.78309	2.2599	18.9584	1.33603e-05	0.00988333
ENSG00000128383	200315	APOBEC3A	2.61398	1.28673	7.58048	0.00590036	0.303707
ENSG00000129646	84074	QRICH2	-1.48008	3.02561	7.19323	0.00731791	0.329197
ENSG00000130164	3949	LDLR	-1.21795	9.64494	3.994	0.0456625	0.661347
ENSG00000130222	10912	GADD45G	-1.01448	6.47048	5.08545	0.0241273	0.549352
ENSG00000130479	55201	MAP1S	-1.75198	5.22764	12.6023	0.000385272	0.0718416
ENSG00000130489	9997	SCO2	1.40576	3.12681	5.93649	0.0148305	0.443726
ENSG00000130540	25830	SULT4A1	-1.43632	1.78248	4.31976	0.0376723	0.638218
ENSG00000130592	4046	LSP1	-1.74854	3.48832	6.4098	0.0113492	0.398527
ENSG00000130600	283120	H19	-2.79392	8.92668	17.928	2.29415e-05	0.0141426
ENSG00000130649	1571	CYP2E1	-1.53195	1.24737	4.21402	0.0400913	0.649456
ENSG00000130821	6535	SLC6A8	-1.29918	9.64615	6.31568	0.0119675	0.409441
ENSG00000130822	139728	PNCK	-1.73994	7.77187	11.0932	0.000866467	0.114916
ENSG00000130921	91574	C12orf65	-1.17326	3.56766	4.79656	0.0285166	0.581671
ENSG00000131042	10288	LILRB2	2.81827	2.56949	11.0478	0.000887937	0.116372
ENSG00000131370	9467	SH3BP5	-1.76077	7.2461	17.8426	2.39956e-05	0.0144041
ENSG00000131389	6533	SLC6A6	-1.76424	8.43295	6.00033	0.0143032	0.437255
ENSG00000131668	56033	BARX1	-2.60462	2.8307	8.92587	0.00281159	0.213201
ENSG00000131981	3958	LGALS3	1.25029	5.86252	6.47315	0.0109516	0.393255
ENSG00000132274	10346	TRIM22	1.21566	3.20063	4.32169	0.0376295	0.638218
ENSG00000132702	60484	HAPLN2	-1.42203	1.99458	4.01071	0.0452121	0.661347
ENSG00000133612	116988	AGAP3	-1.07279	6.02156	8.1625	0.00427653	0.260735
ENSG00000134042	83876	MRO	-1.37334	10.4413	4.70228	0.0301226	0.591594
ENSG00000134057	891	CCNB1	1.35939	2.55341	4.75837	0.0291561	0.584946
ENSG00000134107	8553	BHLHE40	1.14689	6.70525	4.67721	0.0305654	0.593418
ENSG00000134294	54407	SLC38A2	1.06168	6.94684	4.33173	0.0374082	0.636646
ENSG00000134531	2012	EMP1	2.76804	3.5663	10.327	0.00131096	0.141555
ENSG00000134852	9575	CLOCK	1.05171	3.7985	4.29825	0.0381516	0.642147
ENSG00000135046	301	ANXA1	-2.00981	3.79697	8.62762	0.00331104	0.230107
ENSG00000135048	23670	CEMIP2	1.18407	4.03058	5.01583	0.0251166	0.555622
ENSG00000135502	65012	SLC26A10	-3.53084	1.97638	11.6938	0.000627081	0.0938365
ENSG00000135870	149041	RC3H1	1.24822	3.01862	5.24858	0.0219647	0.530227
ENSG00000136002	50649	ARHGEF4	-1.21682	5.74198	5.28854	0.0214662	0.525386
ENSG00000136167	3936	LCP1	2.77976	3.74268	16.425	5.06132e-05	0.0240695
ENSG00000136689	3557	IL1RN	2.11338	0.481432	4.20599	0.0402814	0.649456
ENSG00000136732	2995	GYPC	1.55099	4.29961	5.74504	0.0165353	0.469261
ENSG00000136960	5168	ENPP2	2.16214	2.96299	5.70306	0.0169354	0.47469
ENSG00000137094	25822	DNAJB5	-1.15254	4.72065	4.91024	0.0266979	0.567526
ENSG00000137193	5292	PIM1	1.02893	5.53969	5.63031	0.0176525	0.484198
ENSG00000137198	2766	GMPR	1.66531	2.13015	6.24087	0.0124835	0.414734
ENSG00000137710	5962	RDX	-1.65179	9.90286	5.97182	0.0145363	0.442277
ENSG00000137752	834	CASP1	2.72349	0.787555	6.78684	0.00918322	0.363423
ENSG00000137815	23168	RTF1	-1.37556	7.7442	5.48762	0.0191516	0.498077
ENSG00000137841	5330	PLCB2	2.48841	1.96458	6.54548	0.0105151	0.386002
ENSG00000138080	11117	EMILIN1	2.45376	2.47749	5.65905	0.0173655	0.480134
ENSG00000138119	26509	MYOF	1.40671	6.47062	8.4936	0.00356397	0.238123
ENSG00000138760	950	SCARB2	1.37732	6.95462	9.43773	0.00212567	0.184579
ENSG00000138835	5998	RGS3	1.42561	4.10005	6.4572	0.0110504	0.39372
ENSG00000139044	283358	B4GALNT3	-1.05734	3.94825	4.78813	0.0286566	0.582296
ENSG00000139132	121512	FGD4	2.57122	2.86153	18.6185	1.5966e-05	0.0108468
ENSG00000139329	4060	LUM	1.61362	7.41177	11.9706	0.000540478	0.0848678
ENSG00000139579	79035	NABP2	-1.43564	5.08585	11.1222	0.000853012	0.113584
ENSG00000139910	4857	NOVA1	-1.47815	4.83147	6.30716	0.0120251	0.410054
ENSG00000140254	90527	DUOXA1	-1.67954	4.02984	9.19315	0.00242922	0.199178
ENSG00000140279	50506	DUOX2	-1.33798	9.19104	4.08938	0.0431536	0.65838
ENSG00000140379	597	BCL2A1	2.69097	1.0925	7.19965	0.00729179	0.329197
ENSG00000140678	3687	ITGAX	2.40905	3.44312	18.4588	1.73617e-05	0.0113324
ENSG00000140839	497190	CLEC18B	-1.731	1.52293	4.77399	0.0288928	0.583625
ENSG00000140961	29948	OSGIN1	-1.06774	7.84501	6.04339	0.0139585	0.435078
ENSG00000141027	9611	NCOR1	-1.69077	8.24251	7.15059	0.00749392	0.334404
ENSG00000141505	432	ASGR1	-1.85284	1.68882	5.22732	0.0222348	0.534205
ENSG00000141574	6398	SECTM1	2.64386	1.58168	8.69577	0.00318949	0.227577
ENSG00000141639	5596	MAPK4	-1.45218	4.45492	5.18522	0.0227798	0.538052
ENSG00000141744	5409	PNMT	-1.39339	5.0848	10.679	0.00108358	0.128368
ENSG00000141867	23476	BRD4	-1.41634	8.31531	5.91716	0.0149941	0.447295
ENSG00000142173	1292	COL6A2	-1.24234	9.64663	5.68698	0.0170913	0.476715
ENSG00000142347	4542	MYO1F	2.3506	3.45107	11.7901	0.000595456	0.0901006
ENSG00000142552	57333	RCN3	-1.24766	5.86352	8.20269	0.00418283	0.258526
ENSG00000142627	1969	EPHA2	1.56483	3.97692	7.99132	0.0047002	0.272587
ENSG00000143106	5686	PSMA5	1.02016	5.83527	6.72405	0.00951213	0.366764
ENSG00000143119	963	CD53	3.56351	0.94759	12.4576	0.000416299	0.0741079
ENSG00000143226	2212	FCGR2A	4.22537	2.56463	20.5711	5.74578e-06	0.00617004
ENSG00000143248	8490	RGS5	1.96995	2.58446	7.13498	0.00755944	0.335528
ENSG00000143502	55061	SUSD4	-1.09646	5.82799	7.17892	0.00737649	0.330938
ENSG00000143545	5872	RAB13	-2.02148	8.1783	8.7431	0.00310776	0.224921
ENSG00000143546	6279	S100A8	2.88128	3.54402	10.3852	0.00127026	0.139557
ENSG00000143632	58	ACTA1	-2.93354	1.33694	11.0045	0.000908932	0.116824
ENSG00000143768	7044	LEFTY2	-1.6816	5.77498	6.26275	0.0123303	0.412941
ENSG00000143793	79169	C1orf35	-1.55106	5.16537	6.39559	0.0114404	0.400042
ENSG00000144214	129530	LYG1	-2.04701	1.05159	6.15392	0.0131121	0.426109
ENSG00000144218	3899	AFF3	-2.18252	3.7826	9.96567	0.00159487	0.159914
ENSG00000144224	23190	UBXN4	-1.27365	7.67721	4.5337	0.0332337	0.609372
ENSG00000144485	55502	HES6	-1.35461	5.15075	8.50061	0.00355027	0.238123
ENSG00000145246	57205	ATP10D	1.13156	4.08917	5.78687	0.0161463	0.461765
ENSG00000145725	23262	PPIP5K2	1.15884	4.27453	4.59336	0.0320961	0.605164
ENSG00000145860	153830	RNF145	-2.0226	7.76996	12.5591	0.000394287	0.0718416
ENSG00000145911	23138	N4BP3	-3.36702	3.56947	18.1644	2.02633e-05	0.012972
ENSG00000145990	54438	GFOD1	1.19406	4.08548	5.14724	0.0232834	0.540503
ENSG00000146592	9586	CREB5	1.41794	2.44482	4.54288	0.0330559	0.608492
ENSG00000147155	10682	EBP	-1.35324	6.32182	6.60108	0.0101917	0.381204
ENSG00000147394	7739	ZNF185	-1.85612	5.58304	7.60867	0.00580883	0.302437
ENSG00000147457	91782	CHMP7	-1.03731	4.71056	5.52613	0.0187345	0.496399
ENSG00000147536	84296	GINS4	-1.71036	1.71741	5.20207	0.0225601	0.53643
ENSG00000148600	92211	CDHR1	-1.61372	3.50589	4.68751	0.0303827	0.593022
ENSG00000148671	10974	ADIRF	2.08357	2.22265	5.95895	0.0146428	0.442938
ENSG00000149090	25891	PAMR1	-1.68078	2.24932	5.13599	0.0234347	0.542879
ENSG00000149294	4684	NCAM1	1.56945	5.56061	6.02468	0.0141072	0.436431
ENSG00000149483	51524	TMEM138	1.06335	3.56751	4.66204	0.0308366	0.593994
ENSG00000150687	11098	PRSS23	1.30637	7.79975	5.68196	0.0171402	0.477074
ENSG00000151006	339105	PRSS53	-1.74526	3.00246	6.9649	0.0083124	0.349
ENSG00000151067	775	CACNA1C	-1.14121	7.34156	5.66489	0.0173078	0.479734
ENSG00000151414	140609	NEK7	1.0331	5.3433	4.85318	0.0275953	0.574855
ENSG00000151461	26019	UPF2	-1.91461	7.24669	7.50553	0.00615097	0.309437
ENSG00000151491	2059	EPS8	1.30319	5.71515	9.98596	0.00157739	0.158639
ENSG00000152127	4249	MGAT5	-1.36247	6.69968	9.54674	0.00200304	0.178765
ENSG00000152467	284312	ZSCAN1	-2.01559	2.86366	9.84085	0.00170679	0.167093
ENSG00000152583	8404	SPARCL1	1.52226	3.41556	5.24463	0.0220146	0.530279
ENSG00000152766	118932	ANKRD22	1.55511	4.56298	8.10035	0.00442568	0.265023
ENSG00000152785	651	BMP3	1.27093	4.818	5.00829	0.0252261	0.556494
ENSG00000153071	1601	DAB2	1.44997	3.79679	7.86123	0.00505059	0.280215
ENSG00000153208	10461	MERTK	1.25572	4.73228	7.24735	0.00710059	0.327215
ENSG00000153253	6328	SCN3A	2.41058	3.09952	7.90276	0.00493593	0.279395
ENSG00000153395	79888	LPCAT1	-1.11985	7.39743	5.51397	0.0188652	0.496444
ENSG00000153531	113622	ADPRHL1	-1.22608	4.97173	6.86296	0.00880007	0.357179
ENSG00000153823	55022	PID1	-2.33079	3.77915	9.81852	0.00172763	0.167671
ENSG00000154146	4900	NRGN	2.85589	1.18333	5.54642	0.0185185	0.495948
ENSG00000154262	23460	ABCA6	1.56274	5.18433	10.6074	0.00112637	0.130336
ENSG00000154342	89780	WNT3A	-1.64986	2.46234	6.96715	0.00830196	0.349
ENSG00000154358	84033	OBSCN	-1.33141	4.32794	7.37966	0.00659657	0.316572
ENSG00000154518	518	ATP5MC3	1.03823	6.24762	7.91318	0.00490759	0.279234
ENSG00000154645	140578	CHODL	1.63223	1.68388	4.69687	0.0302176	0.591634
ENSG00000155090	7071	KLF10	1.07838	5.7068	4.73114	0.0296213	0.586867
ENSG00000156531	84295	PHF6	1.18446	4.10456	5.81847	0.0158588	0.457471
ENSG00000156858	78994	PRR14	-1.06508	5.91576	5.66876	0.0172696	0.479074
ENSG00000157502	139221	PWWP3B	1.24855	4.98734	6.85302	0.00884913	0.357179
ENSG00000157557	2114	ETS2	1.29274	4.42573	8.90138	0.00284955	0.215099
ENSG00000157617	25966	C2CD2	-1.03852	7.97531	4.04305	0.0443536	0.661347
ENSG00000157625	257397	TAB3	1.07858	7.68739	5.49073	0.0191175	0.498077
ENSG00000157992	200634	KRTCAP3	-2.13638	0.523205	6.01819	0.0141592	0.436431
ENSG00000158050	1844	DUSP2	1.67448	2.98007	8.31626	0.00392918	0.249753
ENSG00000158517	653361	NCF1	3.37315	2.00458	15.8586	6.82574e-05	0.0284028
ENSG00000158578	212	ALAS2	7.27476	2.34674	22.6066	1.98797e-06	0.00315131
ENSG00000158669	137964	GPAT4	-1.03649	8.0818	5.51967	0.0188038	0.496444
ENSG00000158711	2005	ELK4	1.02358	3.61505	3.96649	0.0464144	0.661347
ENSG00000158747	4681	NBL1	-1.32331	6.67943	9.06594	0.00260414	0.205425
ENSG00000158869	2207	FCER1G	1.92129	2.01004	4.55915	0.0327433	0.606563
ENSG00000159167	6781	STC1	-2.32623	4.56839	9.1137	0.00253702	0.203506
ENSG00000159216	861	RUNX1	1.46867	7.28427	13.2352	0.000274741	0.0590055
ENSG00000159335	5763	PTMS	-1.2624	8.87491	4.76509	0.0290426	0.583776
ENSG00000159388	7832	BTG2	1.49629	6.85613	13.0064	0.00031043	0.0639874
ENSG00000159403	715	C1R	1.15546	8.11836	4.84343	0.0277517	0.576498
ENSG00000159674	10417	SPON2	-1.84362	7.15067	10.811	0.00100899	0.123879
ENSG00000159788	6002	RGS12	-1.10273	4.62522	6.9635	0.0083189	0.349
ENSG00000160209	8566	PDXK	-1.15379	8.44805	5.94088	0.0147936	0.443662
ENSG00000160216	56894	AGPAT3	1.13395	5.13706	7.71021	0.00549095	0.292321
ENSG00000160255	3689	ITGB2	2.82289	4.09131	15.8661	6.79862e-05	0.0284028
ENSG00000160282	10841	FTCD	-2.9402	2.44207	12.8306	0.000340995	0.0669239
ENSG00000160326	11182	SLC2A6	-1.31244	4.86624	8.48717	0.00357661	0.238123
ENSG00000160593	120425	JAML	2.23629	2.34454	7.77802	0.00528857	0.285871
ENSG00000160712	3570	IL6R	1.09722	3.75822	4.40768	0.0357776	0.627026
ENSG00000160868	1576	CYP3A4	1.63322	3.50769	4.5473	0.0329707	0.607664
ENSG00000160870	1551	CYP3A7	2.05957	2.92347	5.49723	0.0190466	0.498077
ENSG00000160888	9592	IER2	-2.46791	8.12248	12.8601	0.000335671	0.0665613
ENSG00000160999	10603	SH2B2	-1.07024	3.60121	4.31574	0.0377614	0.638739
ENSG00000161544	114757	CYGB	-1.1552	4.34801	6.98343	0.00822677	0.349
ENSG00000161958	2256	FGF11	-1.03009	4.91193	5.11595	0.0237069	0.545214
ENSG00000162086	7627	ZNF75A	-1.04963	3.83147	3.97291	0.0462378	0.661347
ENSG00000162148	220004	PPP1R32	-1.26995	2.2153	4.11094	0.0426066	0.6565
ENSG00000162194	79081	LBHD1	-1.401	3.91244	7.47528	0.0062552	0.31079
ENSG00000162241	283130	SLC25A45	-1.49589	3.94873	7.69173	0.00554745	0.293591
ENSG00000162373	79656	BEND5	-1.74509	3.206	6.81151	0.00905722	0.361216
ENSG00000162461	284723	SLC25A34	-1.38435	2.6324	5.22173	0.0223064	0.534599
ENSG00000162511	7805	LAPTM5	2.46122	3.89627	12.3242	0.000447113	0.0783366
ENSG00000162543	127733	UBXN10	1.32935	2.81997	4.39323	0.0360819	0.628443
ENSG00000162545	55450	CAMK2N1	1.24228	5.01709	4.69609	0.0302313	0.591634
ENSG00000162572	6339	SCNN1D	-1.44361	3.63414	7.41775	0.00645835	0.314333
ENSG00000162616	11080	DNAJB4	1.436	3.25704	5.28745	0.0214796	0.525386
ENSG00000162687	343450	KCNT2	1.61431	2.98362	5.19869	0.0226039	0.536863
ENSG00000162692	7412	VCAM1	2.56539	3.13764	6.96154	0.00832802	0.349
ENSG00000162747	2215	FCGR3B	3.6789	3.11481	16.9739	3.78968e-05	0.0194084
ENSG00000162817	79762	C1orf115	-1.08486	5.48493	6.05385	0.013876	0.435078
ENSG00000162924	5966	REL	1.28438	4.07921	4.28992	0.0383389	0.642562
ENSG00000163131	1520	CTSS	2.03008	3.39676	7.20747	0.0072601	0.329197
ENSG00000163219	9938	ARHGAP25	1.4993	2.14173	4.54739	0.0329689	0.607664
ENSG00000163220	6280	S100A9	-3.93917	5.41824	23.2254	1.44082e-06	0.00266464
ENSG00000163221	6283	S100A12	5.09123	-0.243823	8.35156	0.00385357	0.247601
ENSG00000163319	51023	MRPS18C	1.14956	3.51837	5.172	0.0229538	0.53865
ENSG00000163464	3577	CXCR1	2.99173	2.2951	9.71656	0.00182615	0.172065
ENSG00000163563	4332	MNDA	3.13923	4.1896	15.5812	7.90364e-05	0.0304278
ENSG00000163565	3428	IFI16	1.05864	7.0189	7.12323	0.00760917	0.336837
ENSG00000163659	25976	TIPARP	1.0413	5.78175	5.28118	0.0215571	0.526575
ENSG00000163728	151613	TTC14	1.43194	2.66254	6.1069	0.0134655	0.431428
ENSG00000163734	2921	CXCL3	2.23272	1.91156	4.27364	0.038708	0.643372
ENSG00000163755	84343	HPS3	-1.38073	6.02708	6.50107	0.010781	0.391867
ENSG00000163794	7349	UCN	-1.70816	1.66861	6.11446	0.0134081	0.430415
ENSG00000163888	94032	CAMK2N2	-1.71014	1.44241	3.93236	0.0473655	0.661347
ENSG00000163900	90407	TMEM41A	-1.01426	5.10391	5.80847	0.0159492	0.459026
ENSG00000164080	23132	RAD54L2	-1.24083	4.72517	5.94821	0.0147323	0.443019
ENSG00000164128	4886	NPY1R	-2.86758	2.36066	15.4693	8.38544e-05	0.0310159
ENSG00000164164	54726	OTUD4	1.27425	4.7556	7.23432	0.00715228	0.327699
ENSG00000164488	168002	DACT2	-1.90344	3.68094	8.70165	0.00317922	0.227577
ENSG00000164610	6100	RP9	-1.79981	4.6259	7.96508	0.00476883	0.274513
ENSG00000164647	26872	STEAP1	1.69467	4.11368	8.95152	0.00277239	0.212229
ENSG00000164970	203259	FAM219A	-1.10673	5.82833	5.57489	0.0182198	0.492311
ENSG00000165178	654817	NCF1C	3.00706	1.58479	10.609	0.00112541	0.130336
ENSG00000165215	1365	CLDN3	-1.40617	6.03973	12.21	0.000475336	0.0803221
ENSG00000165312	220213	OTUD1	1.20431	4.81323	4.85719	0.0275311	0.574598
ENSG00000165525	9147	NEMF	-1.27983	6.41254	5.34173	0.0208208	0.519677
ENSG00000165915	91252	SLC39A13	1.1495	5.94785	7.30355	0.00688183	0.321755
ENSG00000166257	55800	SCN3B	-1.34834	4.01638	7.88437	0.00498638	0.279556
ENSG00000166558	146167	SLC38A8	2.53797	1.22014	6.24331	0.0124663	0.414734
ENSG00000166825	290	ANPEP	1.74865	5.44351	5.33441	0.0209084	0.519677
ENSG00000166917	101927671	MIR202HG	-1.38767	4.05951	6.17539	0.0129539	0.42485
ENSG00000166961	219995	MS4A15	-3.02198	1.67376	9.06783	0.00260146	0.205425
ENSG00000166974	10982	MAPRE2	1.6347	4.60358	12.2195	0.000472916	0.0803209
ENSG00000167100	201191	SAMD14	-1.18032	4.28252	5.0555	0.024548	0.553517
ENSG00000167157	51450	PRRX2	-2.22327	1.13364	6.26582	0.0123089	0.412641
ENSG00000167434	762	CA4	-1.70183	2.92844	8.04977	0.00455093	0.265886
ENSG00000167476	126306	JSRP1	-1.14448	2.57588	3.99852	0.0455402	0.661347
ENSG00000167508	4597	MVD	-2.09412	8.83833	14.1212	0.000171397	0.046954
ENSG00000167524	124923	RSKR	-1.56434	2.3365	4.56961	0.0325439	0.605274
ENSG00000167670	10036	CHAF1A	-1.29156	4.04921	4.66121	0.0308515	0.593994
ENSG00000167772	51129	ANGPTL4	-1.65612	5.27728	10.0075	0.00155901	0.157266
ENSG00000167861	283987	HID1	-1.10809	3.52755	3.90647	0.0481005	0.661347
ENSG00000167995	7439	BEST1	-1.60822	5.77016	15.646	7.63731e-05	0.0304278
ENSG00000168096	124401	ANKS3	-1.46362	4.69586	8.35782	0.00384032	0.247273
ENSG00000168172	84376	HOOK3	-1.01919	6.13225	4.66637	0.0307588	0.593994
ENSG00000168386	11259	FILIP1L	1.72831	4.85887	13.74	0.00020994	0.0512155
ENSG00000168517	124790	HEXIM2	-1.3327	2.21179	4.3271	0.0375101	0.636754
ENSG00000168872	55308	DDX19A	-1.80194	4.93585	17.3032	3.18658e-05	0.0176797
ENSG00000168874	84913	ATOH8	-1.78481	4.57522	11.3761	0.000743959	0.103622
ENSG00000169062	65110	UPF3A	-1.60651	6.66271	8.65991	0.00325288	0.228933
ENSG00000169174	255738	PCSK9	-2.56702	3.77381	10.3099	0.00132319	0.14209
ENSG00000169246	23117	NPIPB3	-1.50003	6.05993	5.31524	0.0211396	0.522377
ENSG00000169249	8233	ZRSR2	-1.66469	4.58301	7.44947	0.00634552	0.312458
ENSG00000169271	8988	HSPB3	1.96728	3.85105	9.77629	0.00176776	0.169781
ENSG00000169429	3576	CXCL8	-1.44623	4.15523	4.883	0.0271224	0.570998
ENSG00000169442	1043	CD52	3.02878	0.0575604	4.41684	0.0355858	0.627026
ENSG00000169692	10555	AGPAT2	-1.20955	5.54648	7.57974	0.0059028	0.303707
ENSG00000169925	8019	BRD3	1.55865	7.96038	11.2619	0.000791148	0.108381
ENSG00000170345	2353	FOS	1.00232	8.79132	4.73934	0.0294805	0.585895
ENSG00000170369	1470	CST2	1.94116	6.9773	5.017	0.0250996	0.555622
ENSG00000170421	3856	KRT8	1.22614	5.8143	6.90364	0.00860205	0.354023
ENSG00000170458	929	CD14	1.86182	4.07065	7.31688	0.00683097	0.319826
ENSG00000170667	100271927	RASA4B	-1.15135	4.59278	4.34266	0.0371687	0.635496
ENSG00000170835	1056	CEL	-1.59005	2.16726	5.65944	0.0173616	0.480134
ENSG00000171051	2357	FPR1	3.44154	3.22019	19.7544	8.80583e-06	0.00837535
ENSG00000171097	883	KYAT1	1.2027	2.95087	4.37993	0.0363644	0.628443
ENSG00000171219	55561	CDC42BPG	-1.42314	3.48755	4.81524	0.0282091	0.578654
ENSG00000171303	3777	KCNK3	-1.37748	8.62912	9.38149	0.00219188	0.187572
ENSG00000171316	55636	CHD7	-1.78696	6.44612	8.62187	0.0033215	0.230273
ENSG00000171488	84230	LRRC8C	1.14527	4.43434	6.30394	0.012047	0.410054
ENSG00000171659	2857	GPR34	-1.77685	2.4689	6.69559	0.00966514	0.369395
ENSG00000171864	23627	PRND	-2.57433	2.65733	14.6702	0.000128057	0.0377246
ENSG00000171988	221037	JMJD1C	1.31414	5.14611	7.99263	0.00469682	0.272587
ENSG00000172020	2596	GAP43	1.18204	3.61821	4.36431	0.0366994	0.630225
ENSG00000172795	167227	DCP2	1.19264	3.89719	5.27703	0.0216086	0.526644
ENSG00000172893	1717	DHCR7	-1.17278	7.81767	5.28092	0.0215603	0.526575
ENSG00000172965	541471	MIR4435-2HG	3.19027	0.21016	8.19021	0.0042117	0.258526
ENSG00000173083	10855	HPSE	1.29759	4.14972	6.56893	0.0103774	0.384782
ENSG00000173145	64318	NOC3L	1.00607	3.73149	4.27757	0.0386186	0.643372
ENSG00000173531	4485	MST1	-1.30402	3.97437	7.44693	0.00635447	0.312458
ENSG00000173535	8794	TNFRSF10C	3.45553	1.91615	17.9283	2.2938e-05	0.0141426
ENSG00000173727		AP000769.1	-1.5016	4.48419	7.48602	0.00621798	0.310363
ENSG00000173868	162466	PHOSPHO1	3.78251	1.11505	10.7848	0.00102336	0.123879
ENSG00000175110	56945	MRPS22	1.01212	4.39641	5.08719	0.0241032	0.549352
ENSG00000175344	1139	CHRNA7	-2.48411	3.48399	9.59594	0.00195008	0.177853
ENSG00000175592	8061	FOSL1	1.28766	6.20869	5.39949	0.0201427	0.51421
ENSG00000175764	158135	TTLL11	-1.3837	2.02575	4.20512	0.0403022	0.649456
ENSG00000176428	155382	VPS37D	-1.19132	3.06957	5.12682	0.0235588	0.543862
ENSG00000176532	222171	PRR15	-1.52877	3.21287	4.48293	0.0342349	0.616942
ENSG00000176945	200958	MUC20	-1.78991	3.03936	5.27047	0.0216901	0.527038
ENSG00000176978	29952	DPP7	-1.15922	8.21171	6.82659	0.00898106	0.359339
ENSG00000177025	147685	C19orf18	-2.44595	0.630557	6.6117	0.0101311	0.379364
ENSG00000177380	8541	PPFIA3	-1.56338	3.71574	10.8638	0.000980616	0.122261
ENSG00000177427	125170	MIEF2	1.24767	2.61753	5.12924	0.023526	0.543859
ENSG00000177728	9772	TMEM94	-1.4002	7.37667	12.1571	0.00048901	0.0813933
ENSG00000177943	158056	MAMDC4	-1.37762	5.40085	8.83467	0.0029556	0.218786
ENSG00000177946	92806	CENPBD1	-1.55673	3.3	7.4475	0.00635247	0.312458
ENSG00000178342	26251	KCNG2	-1.27365	4.54011	5.44513	0.0196229	0.504812
ENSG00000178343	152573	SHISA3	-2.30987	2.81036	8.24394	0.00408883	0.255298
ENSG00000178425	221294	NT5DC1	1.18937	4.23755	5.16525	0.0230431	0.53892
ENSG00000178773	27132	CPNE7	-1.27664	5.29428	9.27041	0.00232885	0.194787
ENSG00000179344	3119	HLA-DQB1	-5.13651	3.16022	50.6142	1.12429e-12	1.87132e-08
ENSG00000179403	64856	VWA1	-1.84772	4.28491	11.9414	0.000548994	0.0858003
ENSG00000179532	144132	DNHD1	-1.1297	4.80989	5.50867	0.0189224	0.496976
ENSG00000179588	161882	ZFPM1	-1.19414	7.14568	9.7083	0.00183438	0.172065
ENSG00000179954	284297	SSC5D	-1.15065	3.09627	4.53323	0.0332428	0.609372
ENSG00000180089	255043	TMEM86B	-1.60719	2.52379	4.89517	0.0269319	0.570316
ENSG00000180353	3059	HCLS1	2.60072	2.62928	9.84057	0.00170704	0.167093
ENSG00000180806	3225	HOXC9	-1.3914	2.43928	3.9841	0.0459317	0.661347
ENSG00000180871	3579	CXCR2	3.41983	2.66888	14.7224	0.000124557	0.0376087
ENSG00000181004	166379	BBS12	2.05233	3.19699	9.07556	0.00259049	0.205321
ENSG00000181031	9501	RPH3AL	-1.1373	3.17224	4.44511	0.0350013	0.623883
ENSG00000181404	100287171	WASHC1	-1.71672	5.00665	8.2855	0.00399629	0.251817
ENSG00000181652	285973	ATG9B	-1.42857	3.03495	4.83511	0.0278859	0.576748
ENSG00000182197	2131	EXT1	-1.1112	7.02954	6.48016	0.0109085	0.393255
ENSG00000182324	3770	KCNJ14	-1.46912	2.72207	4.20879	0.040215	0.649456
ENSG00000182463	128553	TSHZ2	-1.82531	7.94663	8.09351	0.00444241	0.265023
ENSG00000182487	654816	NCF1B	2.69025	1.10384	5.07815	0.0242292	0.549807
ENSG00000182578	1436	CSF1R	2.43858	2.87196	9.4568	0.00210368	0.184124
ENSG00000182676	116729	PPP1R27	-3.80817	0.58147	9.17908	0.00244797	0.199319
ENSG00000182685	283870	BRICD5	-1.99222	2.93879	12.992	0.000312819	0.0639874
ENSG00000182885	222487	ADGRG3	2.1697	2.09704	9.00904	0.00268647	0.207411
ENSG00000182902	83733	SLC25A18	-1.93591	3.15496	10.6054	0.00112761	0.130336
ENSG00000183055		FAM133CP	-3.78149	1.41154	10.0462	0.00152666	0.155416
ENSG00000183615	84734	FAM167B	-1.80772	1.32152	4.92827	0.0264208	0.566702
ENSG00000184068		SREBF2-AS1	-1.07075	3.1674	4.14633	0.0417249	0.655415
ENSG00000184160	152	ADRA2C	-2.1733	1.54413	6.90332	0.00860358	0.354023
ENSG00000184163	388581	C1QTNF12	-1.95108	0.497597	4.19007	0.0406613	0.651754
ENSG00000184205	64061	TSPYL2	-1.9736	6.75797	21.4889	3.55887e-06	0.00473885
ENSG00000184208	79640	C22orf46	-1.24477	4.92172	5.54718	0.0185105	0.495948
ENSG00000184254	220	ALDH1A3	1.78028	2.84607	5.71606	0.0168104	0.474676
ENSG00000184441		AP001062.1	-1.60779	3.52987	8.05088	0.00454815	0.265886
ENSG00000184557	9021	SOCS3	1.44793	6.73056	7.19519	0.00730992	0.329197
ENSG00000184730	55911	APOBR	2.6141	2.1753	10.5765	0.00114536	0.13193
ENSG00000184752	55967	NDUFA12	1.06558	4.64481	4.58805	0.0321957	0.605164
ENSG00000184925	286256	LCN12	-1.99055	1.10331	6.17079	0.0129877	0.42512
ENSG00000184992	140707	BRI3BP	-1.20657	3.12879	4.9532	0.0260424	0.56354
ENSG00000185149	4887	NPY2R	2.18877	3.11265	7.83475	0.00512513	0.282009
ENSG00000185453	374920	ZSWIM9	-1.40888	4.72604	7.35137	0.00670116	0.317319
ENSG00000185483	4919	ROR1	1.82875	4.0478	9.47013	0.00208845	0.183436
ENSG00000185596		WASH3P	-1.24005	4.82449	5.18585	0.0227715	0.538052
ENSG00000185862	2124	EVI2B	3.27025	1.50729	11.4869	0.000700899	0.0988654
ENSG00000185864	440345	NPIPB4	-1.57508	6.22798	6.1589	0.0130752	0.426109
ENSG00000185924	146760	RTN4RL1	-1.39279	6.1559	7.90719	0.00492386	0.279234
ENSG00000186470	11118	BTN3A2	-1.85618	4.41516	9.31772	0.00226948	0.191748
ENSG00000186765	25794	FSCN2	-1.47095	2.14101	5.01977	0.0250595	0.555622
ENSG00000186891	8784	TNFRSF18	-1.8238	0.998544	4.12733	0.042196	0.655415
ENSG00000186918	55893	ZNF395	-1.08367	7.19911	7.23443	0.00715185	0.327699
ENSG00000186998	129080	EMID1	-1.04133	3.51919	4.29601	0.0382019	0.642147
ENSG00000187116	353514	LILRA5	2.95805	1.6825	7.71677	0.00547103	0.292321
ENSG00000187257	222194	RSBN1L	-1.37123	5.09623	5.60776	0.0178811	0.486311
ENSG00000187630	317749	DHRS4L2	1.85742	2.5397	8.1846	0.00422476	0.258526
ENSG00000187957	92737	DNER	-1.56777	3.4753	6.93502	0.0084524	0.350604
ENSG00000187961	339451	KLHL17	-1.02685	4.11527	5.17155	0.0229597	0.53865
ENSG00000187984	138649	ANKRD19P	-1.81273	1.8527	5.0965	0.0239741	0.548166
ENSG00000188191	5575	PRKAR1B	-1.1356	6.46848	9.61055	0.00193463	0.177789
ENSG00000188290	57801	HES4	-1.35423	2.69515	5.69223	0.0170401	0.47628
ENSG00000188305	374872	PEAK3	-1.22848	2.84743	3.86883	0.0491907	0.661347
ENSG00000188315	375341	C3orf62	-1.06228	3.27407	4.41556	0.0356126	0.627026
ENSG00000188396	343521	TCTEX1D4	1.81272	0.817342	4.25987	0.0390228	0.645731
ENSG00000188404	6402	SELL	4.91883	2.34822	27.4854	1.58285e-07	0.000526914
ENSG00000188488	5104	SERPINA5	-2.2369	5.69659	9.47192	0.00208641	0.183436
ENSG00000188536	3040	HBA2	6.61095	11.3522	19.6443	9.32804e-06	0.00839247
ENSG00000188641	1806	DPYD	1.70243	5.16813	7.59144	0.00586461	0.303707
ENSG00000188681	100132288	TEKT4P2	-1.92569	3.97678	5.60258	0.0179341	0.487353
ENSG00000188785	147694	ZNF548	1.67169	2.37655	6.78557	0.00918975	0.363423
ENSG00000189186	347442	DCAF8L2	1.06997	3.55713	4.06099	0.0438848	0.661347
ENSG00000189221	4128	MAOA	1.49847	2.90821	6.63765	0.00998454	0.376843
ENSG00000189319	9679	FAM53B	-1.03784	7.09319	6.54044	0.0105449	0.386172
ENSG00000196126	3123	HLA-DRB1	-1.82146	5.00286	6.29891	0.0120812	0.410379
ENSG00000196154	6275	S100A4	2.88509	1.70727	5.62977	0.017658	0.484198
ENSG00000196189	64218	SEMA4A	1.47006	1.5615	4.12213	0.0423257	0.6565
ENSG00000196199	54737	MPHOSPH8	-1.09599	6.85361	4.69912	0.0301781	0.591634
ENSG00000196421	284739	C20orf204	-3.47174	1.77263	15.224	9.54801e-05	0.0327674
ENSG00000196436	440348	NPIPB15	-1.35345	3.62143	4.43927	0.0351213	0.624078
ENSG00000196544	54785	BORCS6	-1.11614	4.3946	5.9414	0.0147893	0.443662
ENSG00000196557	8912	CACNA1H	-2.58772	6.73411	17.2008	3.363e-05	0.01777
ENSG00000196642	55684	RABL6	-1.43078	8.76557	7.00484	0.00812897	0.347822
ENSG00000196739	85301	COL27A1	-1.30677	4.15573	4.91184	0.0266733	0.567365
ENSG00000196810		CTBP1-DT	-1.4008	2.90403	6.4383	0.0111686	0.395037
ENSG00000196968	170384	FUT11	-1.39479	5.6509	12.8129	0.000344239	0.0670138
ENSG00000197045	2764	GMFB	1.07594	4.1648	4.49005	0.0340926	0.616129
ENSG00000197249	5265	SERPINA1	1.25624	4.22387	5.70714	0.016896	0.47469
ENSG00000197355	91373	UAP1L1	-1.53358	4.93194	7.85277	0.0050743	0.280595
ENSG00000197405	728	C5AR1	2.66883	3.60718	13.7032	0.000214092	0.0516442
ENSG00000197467	1305	COL13A1	-1.95256	2.45356	7.36452	0.00665234	0.316572
ENSG00000197530	142678	MIB2	-1.58854	7.22728	14.9202	0.000112154	0.0348925
ENSG00000197562	57799	RAB40C	-1.05939	5.79954	4.96685	0.0258377	0.56354
ENSG00000197580	83875	BCO2	1.96027	2.86707	7.56941	0.00593673	0.304511
ENSG00000198046	63934	ZNF667	-1.3275	3.99811	6.04561	0.0139409	0.435078
ENSG00000198169	90987	ZNF251	-1.85673	3.79944	9.34739	0.00223303	0.190116
ENSG00000198417	4494	MT1F	-1.11479	6.23516	4.86968	0.0273326	0.572475
ENSG00000198431	7296	TXNRD1	1.06466	7.34226	4.73181	0.0296098	0.586867
ENSG00000198468	642946	FLVCR1-DT	-1.98665	0.741756	6.0509	0.0138992	0.435078
ENSG00000198598	4326	MMP17	-1.23246	3.79043	5.89163	0.015213	0.450922
ENSG00000198624	26112	CCDC69	-1.46467	7.71151	10.1549	0.00143921	0.149252
ENSG00000198712	4513	MT-CO2	-2.16169	14.1572	4.42846	0.0353443	0.624793
ENSG00000198727	4519	MT-CYB	-2.0761	13.659	4.58014	0.0323446	0.605274
ENSG00000198796	115701	ALPK2	-1.03538	4.84889	5.36873	0.0205009	0.518189
ENSG00000198804	4512	MT-CO1	-2.07307	14.9329	4.20914	0.0402067	0.649456
ENSG00000198816	140467	ZNF358	-1.00589	7.02104	5.55993	0.0183761	0.494135
ENSG00000198855	11153	FICD	-1.05418	2.97985	3.96865	0.046355	0.661347
ENSG00000198873	2869	GRK5	-2.27361	6.37493	12.9891	0.000313315	0.0639874
ENSG00000198899	4508	MT-ATP6	-2.30745	13.9851	4.80492	0.0283786	0.580993
ENSG00000198959	7052	TGM2	1.71926	4.60009	9.44526	0.00211696	0.18448
ENSG00000199627		RNU6-1010P	-2.84789	-0.16872	5.5846	0.0181191	0.490777
ENSG00000199676		RF00019	-4.76462	-1.92843	4.7935	0.0285673	0.582296
ENSG00000202252	85389	SNORD14C	4.0524	-1.42474	7.90768	0.00492255	0.279234
ENSG00000203618	2812	GP1BB	-1.97611	3.40144	6.7631	0.00930618	0.364035
ENSG00000203747	2214	FCGR3A	3.3451	2.16193	11.4919	0.000698985	0.0988654
ENSG00000203804	574406	ADAMTSL4-AS1	1.96902	1.41659	4.72771	0.0296803	0.58701
ENSG00000203875	387066	SNHG5	-1.59733	3.83748	5.0864	0.0241142	0.549352
ENSG00000204065	340543	TCEAL5	-1.19279	3.68772	5.19108	0.0227031	0.537145
ENSG00000204138	65979	PHACTR4	-1.09629	6.9061	5.77553	0.0162508	0.463162
ENSG00000204305	177	AGER	-1.64388	3.85197	11.8449	0.000578203	0.0882927
ENSG00000204397	114769	CARD16	2.54497	1.00326	9.26199	0.00233958	0.195194
ENSG00000204482	7940	LST1	2.54683	1.34481	6.91096	0.0085669	0.353826
ENSG00000204622	3137	HLA-J	-3.41142	0.599608	6.55876	0.0104369	0.384782
ENSG00000204632	3135	HLA-G	-2.94019	1.05703	5.20581	0.0225115	0.536201
ENSG00000204677	653316	FAM153C	-3.40044	3.37342	15.0409	0.000105206	0.0343639
ENSG00000204851	57469	PNMA8B	-1.05292	3.70348	4.49102	0.0340733	0.616129
ENSG00000205129	441054	C4orf47	-1.7412	1.63055	5.78995	0.0161181	0.461354
ENSG00000205403	3426	CFI	1.01482	6.18356	5.20626	0.0225057	0.536201
ENSG00000205517	57139	RGL3	-1.89277	3.40178	5.30596	0.0212526	0.523054
ENSG00000205702	1564	CYP2D7	-1.67729	1.68846	5.99204	0.0143705	0.438078
ENSG00000205763	441212	RP9P	-2.21811	4.15656	10.4213	0.00124568	0.139064
ENSG00000206172	3039	HBA1	6.79167	11.0774	20.8605	4.93971e-06	0.00548127
ENSG00000206177	3042	HBM	9.12863	0.346547	19.3283	1.10066e-05	0.00915994
ENSG00000207497		RF00019	-2.86168	-1.39615	5.18392	0.0227968	0.538052
ENSG00000209082		MT-TL1	-1.99693	5.23803	8.11226	0.00439668	0.265023
ENSG00000210049		MT-TF	-2.32844	3.31513	12.5022	0.000406484	0.0731429
ENSG00000210077		MT-TV	-2.30959	4.35356	14.6819	0.000127261	0.0377246
ENSG00000210082		MT-RNR2	-1.80795	13.9968	3.84587	0.0498687	0.661347
ENSG00000210100		MT-TI	-2.40223	2.66865	10.3228	0.00131397	0.141555
ENSG00000210107		MT-TQ	-2.13938	0.608651	5.094	0.0240087	0.548166
ENSG00000210112		MT-TM	-2.21319	2.59353	9.77974	0.00176445	0.169781
ENSG00000210117		MT-TW	-2.12931	0.365904	5.64183	0.0175369	0.482467
ENSG00000210151		MT-TS1	-2.82783	2.98185	8.19211	0.00420729	0.258526
ENSG00000210154		MT-TD	-2.34444	1.2876	6.59593	0.0102212	0.381855
ENSG00000210156		MT-TK	-2.56883	2.46714	9.2266	0.00238524	0.197028
ENSG00000210174		MT-TR	-2.97381	3.20847	12.5458	0.000397094	0.0718416
ENSG00000210184		MT-TS2	-2.49061	3.87645	11.3542	0.000752776	0.10398
ENSG00000210191		MT-TL2	-2.49177	3.4691	11.3587	0.00075095	0.10398
ENSG00000210196		MT-TP	-2.02247	4.87867	7.75494	0.00535658	0.288466
ENSG00000211445	2878	GPX3	-2.82372	5.04097	13.9841	0.000184359	0.0487074
ENSG00000211459		MT-RNR1	-1.662	11.7759	4.1603	0.0413821	0.655349
ENSG00000211592		IGKC	-2.15191	5.9979	12.8587	0.000335916	0.0665613
ENSG00000211895		IGHA1	6.88846	1.1074	15.8152	6.98392e-05	0.0287022
ENSG00000212123	163154	PRR22	-1.69867	3.07375	7.58682	0.00587967	0.303707
ENSG00000212643		ZRSR2P1	-1.80834	2.21707	3.99836	0.0455446	0.661347
ENSG00000212864	727800	RNF208	-1.58661	4.91278	13.8113	0.000202118	0.0512155
ENSG00000212907	4539	MT-ND4L	-1.99302	11.4997	5.30414	0.0212747	0.523054
ENSG00000213199	9311	ASIC3	-1.17105	4.14406	5.27053	0.0216895	0.527038
ENSG00000213213	84960	CCDC183	-1.05099	3.23815	4.20938	0.0402009	0.649456
ENSG00000213221	728489	DNLZ	-1.22056	3.7977	4.61375	0.0317166	0.602977
ENSG00000213398	3931	LCAT	-1.34931	3.27135	5.8474	0.0156001	0.453973
ENSG00000213599	100526830	SLX1A-SULT1A3	-1.37377	3.45684	5.54665	0.0185161	0.495948
ENSG00000213648	445329	SULT1A4	-3.15858	2.81306	16.3324	5.31467e-05	0.0242356
ENSG00000213654	63940	GPSM3	1.77164	2.39565	5.10562	0.0238484	0.547076
ENSG00000213889	147699	PPM1N	-2.35005	1.40294	5.70358	0.0169303	0.47469
ENSG00000214548	55384	MEG3	-1.14283	6.87229	5.06643	0.0243936	0.552031
ENSG00000214832		UPF3AP2	-2.23926	0.944572	6.03261	0.014044	0.436431
ENSG00000214900	283551	LINC01588	-2.28744	4.1054	11.0245	0.000899167	0.116468
ENSG00000214940	101059953	NPIPA8	-1.16113	3.97503	5.27718	0.0216067	0.526644
ENSG00000214967	101059938	NPIPA7	-1.2324	3.247	4.92333	0.0264964	0.567365
ENSG00000215218	134111	UBE2QL1	-1.29532	2.93801	4.75149	0.0292729	0.585442
ENSG00000215478		CES5AP1	-2.38279	1.74951	9.5719	0.00197578	0.178625
ENSG00000215717	56900	TMEM167B	1.01947	4.28335	5.02826	0.024937	0.55527
ENSG00000218227		AC136632.1	-3.65162	0.836356	8.0518	0.00454584	0.265886
ENSG00000218713		AL512378.1	-3.04541	2.70277	10.4102	0.00125324	0.139064
ENSG00000220201	100125288	ZGLP1	-2.15358	2.44974	9.77421	0.00176977	0.169781
ENSG00000221083		RF00599	-4.27275	-0.91548	7.15735	0.00746575	0.333766
ENSG00000221125		RF00012	5.15223	0.781922	23.457	1.2774e-06	0.00250137
ENSG00000221643	677843	SNORA77	-3.12393	1.60937	7.39451	0.00654234	0.316552
ENSG00000223542		AL024497.1	-2.94911	0.214155	6.86523	0.0087889	0.357179
ENSG00000223575		RBMX2P3	-4.99239	1.08142	11.1995	0.000818174	0.111168
ENSG00000223749	84848	MIR503HG	-1.2922	5.63146	7.88367	0.00498831	0.279556
ENSG00000223884	101929452	AC068481.1	-3.20698	0.686255	10.2644	0.0013562	0.143779
ENSG00000224420	199800	ADM5	-2.11903	2.71344	12.0691	0.000512642	0.0828415
ENSG00000224660	100505696	SH3BP5-AS1	-1.23227	5.06857	4.76416	0.0290582	0.583776
ENSG00000225465		RFPL1S	-1.12776	3.25787	5.02035	0.0250511	0.555622
ENSG00000225697	65010	SLC26A6	-1.07714	5.23488	7.42625	0.00642791	0.314333
ENSG00000225746		MEG8	-2.51864	2.92318	11.9843	0.000536513	0.0846445
ENSG00000225756	138948	DBH-AS1	-2.21404	3.11977	8.59744	0.00336637	0.232014
ENSG00000225761		AL596247.1	-3.73476	1.11246	8.8309	0.00296173	0.218786
ENSG00000225972		MTND1P23	2.00333	6.66226	6.61874	0.0100911	0.379146
ENSG00000226210	100288778	WASH8P	-1.49682	4.48147	8.39005	0.0037728	0.244049
ENSG00000226499		AL136380.1	-3.07885	-1.00103	4.39747	0.0359922	0.628132
ENSG00000227507	4050	LTB	2.89293	0.972489	7.19586	0.00730719	0.329197
ENSG00000228594	643988	FNDC10	-1.28453	7.01783	10.3258	0.00131182	0.141555
ENSG00000228739		AL162384.1	-1.3539	2.26884	4.37049	0.0365664	0.630225
ENSG00000229122		AGBL5-IT1	-2.87663	-0.422483	4.77005	0.028959	0.583776
ENSG00000229299		AL121845.1	-4.85982	-0.10711	14.0366	0.000179291	0.0477472
ENSG00000229807	7503	XIST	1.62008	5.79037	13.2139	0.000277884	0.0592979
ENSG00000229809	146542	ZNF688	-1.48814	4.88877	7.38112	0.0065912	0.316572
ENSG00000230076		RPL10P6	-3.24108	-0.0117026	7.82212	0.00516107	0.283509
ENSG00000230202		AL450405.1	1.45592	4.99426	7.10075	0.00770518	0.339738
ENSG00000230453	441459	ANKRD18B	-1.98382	2.38387	6.71237	0.00957463	0.367624
ENSG00000230724		LINC01001	2.56784	1.20809	6.28771	0.0121578	0.410467
ENSG00000231625		SLC47A1P2	-1.80684	3.45251	8.08484	0.0044637	0.265023
ENSG00000231721	378805	LINC-PINT	-1.39481	3.66008	4.5769	0.0324057	0.605274
ENSG00000231948	100874343	HS1BP3-IT1	-1.88782	1.57547	6.37026	0.0116048	0.403556
ENSG00000232434	389813	AJM1	-1.31303	5.2437	6.88394	0.00869737	0.356475
ENSG00000232788		ITGA6-AS1	-2.04309	1.03228	6.43515	0.0111884	0.395037
ENSG00000233871		DLG5-AS1	-1.49454	2.05696	5.11531	0.0237156	0.545214
ENSG00000233913		RPL10P9	-6.22451	4.83968	31.4203	2.07794e-08	0.000115288
ENSG00000233929		MT1XP1	-2.71995	0.00072474	6.04405	0.0139533	0.435078
ENSG00000234353		AP000346.2	-2.36871	2.65432	8.74293	0.00310804	0.224921
ENSG00000234684	100507495	SDCBP2-AS1	1.66546	2.10062	5.58575	0.0181071	0.490777
ENSG00000235482		RPL21P135	-3.22024	0.665308	8.33816	0.00388209	0.248521
ENSG00000235852		AC005540.1	5.29255	0.819186	19.0539	1.2708e-05	0.00980431
ENSG00000235954	284900	TTC28-AS1	-1.25168	3.59553	5.35852	0.0206212	0.518605
ENSG00000236017		ASMTL-AS1	-1.96296	3.07143	6.72155	0.00952549	0.366764
ENSG00000236540		AC006547.1	-1.69526	1.35615	3.88709	0.0486586	0.661347
ENSG00000237094		AL732372.2	2.304	1.33097	6.32961	0.0118739	0.407695
ENSG00000237575	23615	PYY2	-2.20044	2.91759	13.8225	0.000200919	0.0512155
ENSG00000237686	101929705	AL109615.3	-1.75404	3.20633	9.38947	0.00218236	0.187238
ENSG00000237973		MTCO1P12	-1.93636	10.1193	6.22789	0.0125753	0.416952
ENSG00000238045		AC009133.1	-2.54468	2.86635	9.64674	0.00189688	0.175404
ENSG00000238061		AL356273.2	-4.01519	0.771937	12.4253	0.000423563	0.075
ENSG00000239617		AC073610.1	-2.51515	1.54575	9.28969	0.00230448	0.193233
ENSG00000240233		RN7SL587P	-4.59805	-0.660372	10.4843	0.00120395	0.135526
ENSG00000240370	283345	RPL13P5	-2.60866	4.72711	15.5783	7.91574e-05	0.0304278
ENSG00000240801		AC132217.1	-1.9181	0.627445	4.33921	0.0372442	0.635807
ENSG00000241400		AC022215.1	-2.65141	-0.626449	4.38944	0.0361623	0.628443
ENSG00000242252	632	BGLAP	-2.68429	0.709708	7.90825	0.00492099	0.279234
ENSG00000242588		AC108010.1	1.84106	1.89093	5.17046	0.0229741	0.53865
ENSG00000242615		AC022415.1	-1.44462	1.62249	3.9538	0.0467656	0.661347
ENSG00000242759	100302640	LINC00882	2.03769	0.474806	5.45965	0.0194606	0.501728
ENSG00000243701	344595	DUBR	1.3832	3.11247	5.27299	0.0216587	0.527038
ENSG00000244482	79168	LILRA6	2.50824	1.53137	9.55311	0.00199611	0.178625
ENSG00000244734	3043	HBB	8.01333	10.5069	30.6664	3.06428e-08	0.000127508
ENSG00000245532	283131	NEAT1	-2.35271	8.49237	9.51997	0.00203247	0.180349
ENSG00000246859	100505678	STARD4-AS1	1.51775	4.15203	8.51407	0.00352412	0.238123
ENSG00000248092		NNT-AS1	-1.3241	2.82909	4.19943	0.0404376	0.650735
ENSG00000248187		AC078850.1	-1.13129	5.30276	6.66843	0.00981355	0.372501
ENSG00000248527		MTATP6P1	-1.84513	11.4018	4.62193	0.0315657	0.602415
ENSG00000248593	171220	DSTNP2	-1.73302	3.2498	9.55476	0.00199431	0.178625
ENSG00000248690		HAS2-AS1	-1.60041	1.5887	4.24147	0.0394479	0.646569
ENSG00000249353		NPM1P27	1.16345	2.68421	4.13934	0.0418976	0.655415
ENSG00000250067	374887	YJEFN3	-1.92884	3.6951	9.02788	0.00265892	0.20729
ENSG00000250461		AC122718.1	-2.8548	4.15707	12.108	0.000502061	0.081927
ENSG00000250571	2738	GLI4	-1.56073	3.99027	8.88834	0.00286998	0.216151
ENSG00000251562	378938	MALAT1	1.08728	6.20261	6.42252	0.0112682	0.39652
ENSG00000252101		RNU6-758P	-4.49603	-2.10092	5.25503	0.0218834	0.529415
ENSG00000254122	56099	PCDHGB7	1.35114	2.86283	4.56659	0.0326014	0.605274
ENSG00000254211		LINC01485	-1.50778	3.00012	4.46503	0.0345955	0.62008
ENSG00000254413	386593	CHKB-CPT1B	-1.8187	3.53936	7.36126	0.00666442	0.316572
ENSG00000254593		OR7E126P	-2.75772	1.08983	5.51653	0.0188376	0.496444
ENSG00000254607	101929427	AP001783.1	-1.78105	1.80044	6.52797	0.0106191	0.387609
ENSG00000255986	4498	MT1JP	-1.93072	0.826939	3.8716	0.0491097	0.661347
ENSG00000258301	100506603	VASH1-AS1	-2.56306	2.6854	8.67722	0.00322212	0.22818
ENSG00000258674		AC011448.1	1.86804	4.62901	14.7096	0.000125404	0.0376087
ENSG00000259024	100533496	TVP23C-CDRT4	-1.04855	3.09047	4.25462	0.0391438	0.645792
ENSG00000259460		AC078909.1	-3.01118	-0.050411	4.51445	0.0336097	0.612936
ENSG00000259668		AC066613.1	-2.00729	1.41379	7.6424	0.0057012	0.298407
ENSG00000259771		AC092756.1	-4.91008	-0.0769433	11.2662	0.000789329	0.108381
ENSG00000260001	100507588	TGFBR3L	-1.59902	1.01649	4.25325	0.0391753	0.645792
ENSG00000260038		AC009090.1	-2.92015	-0.481156	4.67884	0.0305364	0.593418
ENSG00000260077		AC104794.2	-1.72607	2.24977	5.97038	0.0145481	0.442277
ENSG00000260196		AC124798.1	-1.62489	2.94564	9.01786	0.00267355	0.207388
ENSG00000260280	100526831	SLX1B-SULT1A4	-1.23239	3.25221	4.73323	0.0295853	0.586867
ENSG00000260335		AC133555.4	3.59853	-1.24748	5.48257	0.019207	0.498305
ENSG00000260342		AC138811.2	2.03956	3.8991	9.29313	0.00230015	0.193233
ENSG00000260428	642658	SCX	-2.59365	2.34927	12.8264	0.000341766	0.0669239
ENSG00000260534		AC100827.3	-3.18647	3.00073	13.4643	0.000243141	0.054422
ENSG00000260549	4500	MT1L	-1.67522	3.64938	7.08662	0.00776617	0.340154
ENSG00000260630	197187	SNAI3-AS1	-1.77253	4.15245	13.0139	0.000309182	0.0639874
ENSG00000260643		AC092718.3	-3.11403	0.802724	6.01248	0.014205	0.436508
ENSG00000261052	6818	SULT1A3	-2.42207	2.46044	11.8273	0.000583677	0.0887216
ENSG00000261408	100529145	TEN1-CDK3	-1.4225	5.04377	5.61429	0.0178145	0.486244
ENSG00000261578		AP003119.3	-1.80409	3.45009	12.2835	0.00045698	0.0788208
ENSG00000261888		AC144831.1	-1.23269	2.52144	4.67583	0.0305899	0.593418
ENSG00000262413		AC145207.2	-1.4155	2.53412	5.29544	0.0213813	0.524126
ENSG00000262454		MIR193BHG	-1.64984	5.03844	9.65603	0.00188731	0.175004
ENSG00000262528		AL022341.2	-2.04779	2.44515	7.12614	0.00759682	0.336738
ENSG00000262580		AC087741.1	-1.22527	2.94387	4.71454	0.0299086	0.589477
ENSG00000263020		AL662899.2	2.90162	4.95468	9.76696	0.00177676	0.169875
ENSG00000263033		AC007220.1	-2.06027	0.867959	6.93258	0.00846396	0.350604
ENSG00000263301		AC113189.3	-2.00416	-0.0624955	4.25994	0.0390214	0.645731
ENSG00000265972	10628	TXNIP	1.32142	4.96241	6.57553	0.010339	0.384554
ENSG00000266010	100128893	GATA6-AS1	-1.17778	5.15212	8.65057	0.00326959	0.229002
ENSG00000267117		AC010525.1	-4.52138	0.108732	9.04557	0.00263332	0.206747
ENSG00000267121	339192	AC008105.3	-2.1974	1.0059	5.8647	0.0154475	0.452627
ENSG00000267281	8620	ATF7	-2.04945	2.45509	9.75813	0.00178532	0.169875
ENSG00000267317		AC027307.2	-1.29584	2.6183	4.76197	0.0290953	0.58417
ENSG00000267458		AC092069.1	-2.24523	-0.530705	4.77145	0.0289355	0.583776
ENSG00000267919		AC009955.2	-2.42011	0.212687	5.78398	0.0161729	0.462128
ENSG00000268043	149013	NBPF12	-1.55692	4.58467	7.34278	0.00673326	0.317592
ENSG00000268350	29057	FAM156A	-1.14248	4.93818	7.06907	0.00784259	0.341262
ENSG00000269834	102724105	ZNF528-AS1	-1.96099	2.76705	6.53226	0.0105935	0.387447
ENSG00000269976		AC012065.3	-2.655	2.41165	10.7464	0.00104485	0.125663
ENSG00000270800	100529239	RPS10-NUDT3	-7.52854	5.77783	128.247	9.9133e-30	3.30004e-25
ENSG00000271425	100132406	NBPF10	-1.34524	6.54131	6.8534	0.00884729	0.357179
ENSG00000271503	6352	CCL5	6.02876	1.14409	18.8506	1.41367e-05	0.0102304
ENSG00000272256		AC044849.1	-1.33194	2.97176	3.96148	0.0465528	0.661347
ENSG00000272574		AL596325.2	-3.32987	0.850399	9.07637	0.00258933	0.205321
ENSG00000272669		AL021707.6	-1.8097	2.60682	5.69736	0.0169905	0.47569
ENSG00000273036		AL390726.5	-2.43099	2.11646	10.643	0.00110485	0.129149
ENSG00000273066		AL355987.4	-1.63169	3.71497	9.33846	0.00224393	0.190557
ENSG00000273188		AL022328.3	-3.51805	0.378105	10.2343	0.00137856	0.145225
ENSG00000273192		AL671710.1	-1.2983	2.34541	4.24323	0.0394071	0.646536
ENSG00000273218		AC005776.2	-1.98091	1.50278	4.96793	0.0258216	0.56354
ENSG00000273319		AC058791.1	-2.62645	2.63399	8.05049	0.00454912	0.265886
ENSG00000273420		AC008738.7	-1.20481	3.80225	4.16203	0.0413398	0.655349
ENSG00000273466		AC012510.1	-2.35133	0.828493	6.95272	0.00836917	0.349563
ENSG00000274021		AC024909.1	1.95209	3.37655	5.17869	0.0228656	0.53865
ENSG00000274177		AC004528.2	-1.9084	1.0755	4.78119	0.0287723	0.582603
ENSG00000274312		AC015722.2	-2.36499	0.313191	5.25919	0.0218312	0.528822
ENSG00000274372		AC239803.3	-2.79526	-0.242976	4.1449	0.0417602	0.655415
ENSG00000274383		AC103691.1	-2.04738	1.61444	5.53747	0.0186134	0.49618
ENSG00000275703		U47924.3	-2.41784	-0.145117	4.26829	0.0388299	0.644634
ENSG00000276023	11072	DUSP14	1.17394	4.53805	6.00813	0.0142401	0.436508
ENSG00000276261		AC009509.4	-3.08506	0.269739	8.24106	0.00409532	0.255298
ENSG00000276529		AP001505.1	-1.84038	1.63305	5.94636	0.0147477	0.443084
ENSG00000277209	85495	RPPH1	-2.03403	1.71883	5.33353	0.0209189	0.519677
ENSG00000277749		AC023300.2	-2.14743	2.65767	12.6895	0.00036771	0.0707555
ENSG00000278177		AL354811.1	-1.62454	1.86637	4.45985	0.0347005	0.620717
ENSG00000278233	109864281	RNA5-8SN2	-1.50758	1.66648	3.96562	0.0464385	0.661347
ENSG00000278599	102723859	TBC1D3E	-2.62133	2.60694	8.28401	0.00399956	0.251817
ENSG00000278952		AP003068.4	-2.29594	1.95264	10.6416	0.0011057	0.129149
ENSG00000279281		AC015883.1	-2.71897	2.12952	9.18394	0.00244148	0.199319
ENSG00000279689		AC022400.9	-1.5919	4.67361	11.681	0.000631421	0.0938365
ENSG00000279799		AC006077.2	-2.6499	-0.380829	5.82956	0.0157591	0.455386
ENSG00000280143		AP000892.3	-1.70874	4.48005	8.14234	0.00432434	0.261944
ENSG00000280987	9782	MATR3	2.01699	3.84175	6.37285	0.0115879	0.403556
ENSG00000281903		LINC02246	-5.24688	1.4841	14.0514	0.000177881	0.0477472
ENSG00000281991	100862671	TMEM265	-2.825	1.28793	7.41335	0.00647417	0.314333
ENSG00000283196	107985911	AC006453.2	-1.83338	1.69257	3.96513	0.0464518	0.661347
ENSG00000284292		AC004922.1	3.64295	2.86062	19.8086	8.55968e-06	0.00837535
ENSG00000284606		AC105233.5	-1.50582	2.33304	5.54104	0.0185755	0.49618
ENSG00000284627		AC079781.4	-2.20303	0.578069	4.52945	0.0333163	0.609377
ENSG00000284727		AC116562.4	-2.35655	0.881945	6.44142	0.0111489	0.394827
ENSG00000284976		BX255925.3	-1.22821	5.90645	7.86454	0.00504137	0.280215
ENSG00000285420		AC011342.1	-1.63521	1.83782	5.07899	0.0242175	0.549807
ENSG00000286112	883	AL441992.2	-2.56775	3.9345	7.91059	0.00491463	0.279234
