# Supplementary material for: Identification of Epigenetic Interactions between MicroRNA and DNA Methylation Associated with Polycystic Ovarian Syndrome
Source: Preprints.org preprint supplement (doi:10.20944/preprints201910.0191.v1), 2019-10-17
Supplement: Supplementary file 4 [file Table S4 Differently expressed miRNAs.xlsx]

## Sheet: Sheet 1
miRNA	logFC	logCPM	LR	PValue	FDR
hsa-miR-10a-5p	3.84188	4.58594	12.0911	0.000506621	0.301693
hsa-miR-4440	5.59999	0.478675	10.8107	0.00100917	0.40064
hsa-miR-188-3p	3.2813	1.26419	7.52491	0.00608517	0.628929
hsa-miR-548ar-3p	-5.28659	0.394064	7.39782	0.00653029	0.628929
hsa-miR-18a-5p	-2.1544	2.98014	7.34205	0.00673601	0.628929
hsa-miR-3136-5p	2.85994	1.17276	6.67219	0.00979289	0.628929
hsa-miR-146a-5p	2.64268	7.74713	6.5236	0.0106453	0.628929
hsa-miR-141-3p	-3.05907	1.76541	6.13721	0.0132366	0.628929
hsa-miR-20b-5p	2.30011	5.89362	6.06841	0.0137621	0.628929
hsa-miR-196a-5p	3.57276	0.770808	5.7221	0.0167527	0.628929
hsa-miR-501-5p	3.01769	1.1617	5.71667	0.0168045	0.628929
hsa-miR-877-5p	-1.58444	3.10264	5.66502	0.0173065	0.628929
hsa-miR-1299	2.17502	4.69631	5.60386	0.0179209	0.628929
hsa-miR-429	-1.60067	3.63188	5.44974	0.0195713	0.628929
hsa-miR-126-3p	-1.91973	8.41098	5.44782	0.0195927	0.628929
hsa-miR-2355-5p	-2.69782	1.2916	5.32852	0.0209792	0.628929
hsa-miR-144-5p	-2.01949	10.8347	5.30923	0.0212127	0.628929
hsa-miR-510-5p	1.30847	4.05637	5.22714	0.0222371	0.628929
hsa-miR-451a	2.08572	16.2066	5.20231	0.0225569	0.628929
hsa-miR-4504	3.70436	0.399457	5.10475	0.0238604	0.628929
hsa-miR-1298-5p	1.65616	4.06749	4.93262	0.0263543	0.628929
hsa-miR-6509-5p	-2.36608	0.907536	4.8573	0.0275294	0.628929
hsa-miR-12129	2.20031	1.23314	4.69727	0.0302105	0.628929
hsa-miR-937-3p	-1.53005	2.43609	4.44003	0.0351055	0.628929
hsa-miR-508-3p	1.04768	11.2327	4.28283	0.0384992	0.628929
hsa-miR-100-3p	1.57768	1.9848	4.2569	0.0390911	0.628929
hsa-miR-3688-3p	2.05458	1.97201	4.23514	0.0395954	0.628929
hsa-miR-19b-1-5p	1.31099	2.59167	3.91664	0.0478103	0.628929
hsa-miR-20a-3p	1.27426	2.85087	3.89914	0.048311	0.628929
hsa-miR-433-3p	-1.37133	2.30829	3.85938	0.0494686	0.628929
