# Supplementary material for: Identification of Epigenetic Interactions between MicroRNA and DNA Methylation Associated with Polycystic Ovarian Syndrome
Source: Preprints.org preprint supplement (doi:10.20944/preprints201910.0191.v1), 2019-10-17
Supplement: Supplementary file 5 [file Table S5 Predicted target genes of DEmiRs.xlsx]

## Sheet: Sheet1
Gene	Count	miRNA
PTEN	6	hsa-miR-10a-5p,hsa-miR-141-3p,hsa-miR-18a-5p,hsa-miR-20a-3p,hsa-miR-20b-5p,hsa-miR-429
BCL2	4	hsa-miR-126-3p,hsa-miR-18a-5p,hsa-miR-429,hsa-miR-451a
HIF1A	4	hsa-miR-18a-5p,hsa-miR-20b-5p,hsa-miR-429,hsa-miR-433-3p
CDKN1A	3	hsa-miR-146a-5p,hsa-miR-196a-5p,hsa-miR-20b-5p
DNMT1	3	hsa-miR-126-3p,hsa-miR-18a-5p,hsa-miR-429
ROCK1	3	hsa-miR-126-3p,hsa-miR-144-5p,hsa-miR-146a-5p
SMAD4	3	hsa-miR-144-5p,hsa-miR-146a-5p,hsa-miR-18a-5p
SOX2	3	hsa-miR-126-3p,hsa-miR-146a-5p,hsa-miR-429
VEGFA	3	hsa-miR-126-3p,hsa-miR-20b-5p,hsa-miR-429
AKT1	2	hsa-miR-126-3p,hsa-miR-451a
BAP1	2	hsa-miR-141-3p,hsa-miR-429
BRCA1	2	hsa-miR-146a-5p,hsa-miR-20b-5p
CCND1	2	hsa-miR-146a-5p,hsa-miR-19b-1-5p
CCNE2	2	hsa-miR-126-3p,hsa-miR-144-5p
CRKL	2	hsa-miR-126-3p,hsa-miR-429
CXCL12	2	hsa-miR-126-3p,hsa-miR-146a-5p
CXCL8	2	hsa-miR-100-3p,hsa-miR-146a-5p
CXCR4	2	hsa-miR-126-3p,hsa-miR-146a-5p
ELMO2	2	hsa-miR-141-3p,hsa-miR-429
ERBIN	2	hsa-miR-141-3p,hsa-miR-429
ESR1	2	hsa-miR-18a-5p,hsa-miR-20b-5p
EZH2	2	hsa-miR-126-3p,hsa-miR-429
HOXB5	2	hsa-miR-141-3p,hsa-miR-429
IL6	2	hsa-miR-146a-5p,hsa-miR-451a
KLF11	2	hsa-miR-141-3p,hsa-miR-429
KLHL20	2	hsa-miR-141-3p,hsa-miR-429
KRAS	2	hsa-miR-126-3p,hsa-miR-433-3p
MALAT1	2	hsa-miR-141-3p,hsa-miR-429
MAPK9	2	hsa-miR-141-3p,hsa-miR-20b-5p
MET	2	hsa-miR-144-5p,hsa-miR-433-3p
MIF	2	hsa-miR-146a-5p,hsa-miR-451a
MYC	2	hsa-miR-429,hsa-miR-451a
NFKB1	2	hsa-miR-146a-5p,hsa-miR-508-3p
NFKBIA	2	hsa-miR-126-3p,hsa-miR-196a-5p
PHLPP1	2	hsa-miR-141-3p,hsa-miR-18a-5p
PIK3CG	2	hsa-miR-10a-5p,hsa-miR-126-3p
PTPRD	2	hsa-miR-141-3p,hsa-miR-429
RASSF2	2	hsa-miR-141-3p,hsa-miR-429
RIN2	2	hsa-miR-141-3p,hsa-miR-429
RUNX1	2	hsa-miR-144-5p,hsa-miR-18a-5p
SEPT7	2	hsa-miR-141-3p,hsa-miR-429
SHC1	2	hsa-miR-141-3p,hsa-miR-429
SMAD2	2	hsa-miR-146a-5p,hsa-miR-18a-5p
TCF7L1	2	hsa-miR-141-3p,hsa-miR-429
TGFBR2	2	hsa-miR-18a-5p,hsa-miR-196a-5p
TYMS	2	hsa-miR-196a-5p,hsa-miR-433-3p
VAC14	2	hsa-miR-141-3p,hsa-miR-429
WDR37	2	hsa-miR-141-3p,hsa-miR-429
ZEB1	2	hsa-miR-141-3p,hsa-miR-429
ZEB2	2	hsa-miR-141-3p,hsa-miR-429
ZFPM2	2	hsa-miR-141-3p,hsa-miR-429
ABCB1	1	hsa-miR-451a
ACTG1	1	hsa-miR-10a-5p
ACVR2B	1	hsa-miR-141-3p
ADAM10	1	hsa-miR-451a
ADAM9	1	hsa-miR-126-3p
ADGRE5	1	hsa-miR-126-3p
ADM	1	hsa-miR-126-3p
AKT3	1	hsa-miR-20b-5p
ANXA1	1	hsa-miR-196a-5p
ARID4B	1	hsa-miR-20b-5p
ATM	1	hsa-miR-18a-5p
AZIN1	1	hsa-miR-433-3p
BACH1	1	hsa-miR-196a-5p
BAMBI	1	hsa-miR-20b-5p
BCL2L10	1	hsa-miR-18a-5p
BCL2L11	1	hsa-miR-10a-5p
BCL6	1	hsa-miR-10a-5p
BCLAF1	1	hsa-miR-146a-5p
BDNF	1	hsa-miR-10a-5p
BID	1	hsa-miR-20a-3p
BRCA2	1	hsa-miR-146a-5p
BRD3	1	hsa-miR-141-3p
BTRC	1	hsa-miR-10a-5p
CAB39	1	hsa-miR-451a
CADM1	1	hsa-miR-126-3p
CARD10	1	hsa-miR-146a-5p
CASP7	1	hsa-miR-146a-5p
CASP8	1	hsa-miR-19b-1-5p
CBL	1	hsa-miR-188-3p
CCL5	1	hsa-miR-146a-5p
CCNA2	1	hsa-miR-146a-5p
CCND2	1	hsa-miR-146a-5p
CCNE1	1	hsa-miR-144-5p
CD40LG	1	hsa-miR-146a-5p
CD80	1	hsa-miR-146a-5p
CDC25A	1	hsa-miR-141-3p
CDC25C	1	hsa-miR-141-3p
CDK19	1	hsa-miR-18a-5p
CDKN1B	1	hsa-miR-196a-5p
CDKN2D	1	hsa-miR-451a
CDKN3	1	hsa-miR-146a-5p
CDYL	1	hsa-miR-141-3p
CFH	1	hsa-miR-146a-5p
CFTR	1	hsa-miR-433-3p
CHL1	1	hsa-miR-10a-5p
CLOCK	1	hsa-miR-141-3p
CNOT6L	1	hsa-miR-146a-5p
COPS8	1	hsa-miR-146a-5p
COX2	1	hsa-miR-146a-5p
CPM	1	hsa-miR-146a-5p
CPNE3	1	hsa-miR-451a
CREB1	1	hsa-miR-433-3p
CRIM1	1	hsa-miR-20b-5p
CRK	1	hsa-miR-126-3p
CTBP2	1	hsa-miR-141-3p
CTGF	1	hsa-miR-18a-5p
DCBLD2	1	hsa-miR-451a
DICER1	1	hsa-miR-18a-5p
DKK1	1	hsa-miR-501-5p
DLC1	1	hsa-miR-429
DLX5	1	hsa-miR-141-3p
DUSP1	1	hsa-miR-146a-5p
E2F3	1	hsa-miR-141-3p
EFNB2	1	hsa-miR-20b-5p
EGFL7	1	hsa-miR-126-3p
EGFR	1	hsa-miR-146a-5p
EGR2	1	hsa-miR-20a-3p
EIF4E	1	hsa-miR-141-3p
ELAVL1	1	hsa-miR-146a-5p
ELOVL1	1	hsa-miR-196a-5p
EPHA4	1	hsa-miR-10a-5p
EPHB4	1	hsa-miR-20b-5p
ERBB4	1	hsa-miR-146a-5p
FADD	1	hsa-miR-146a-5p
FAF1	1	hsa-miR-146a-5p
FANCM	1	hsa-miR-146a-5p
FAS	1	hsa-miR-146a-5p
FCGR2B	1	hsa-miR-18a-5p
FGF20	1	hsa-miR-433-3p
FGFR2	1	hsa-miR-19b-1-5p
FOXO1	1	hsa-miR-196a-5p
FOXO3	1	hsa-miR-126-3p
FSCN1	1	hsa-miR-429
FZD6	1	hsa-miR-20b-5p
GBP2	1	hsa-miR-433-3p
GJA1	1	hsa-miR-1298-5p
GP1BA	1	hsa-miR-10a-5p
GRB2	1	hsa-miR-433-3p
GSK3B	1	hsa-miR-501-5p
HDGF	1	hsa-miR-141-3p
HIPK2	1	hsa-miR-141-3p
HIPK3	1	hsa-miR-20b-5p
HMGA1	1	hsa-miR-196a-5p
HMGA2	1	hsa-miR-196a-5p
HMOX1	1	hsa-miR-196a-5p
HNRNPD	1	hsa-miR-141-3p
HOXA1	1	hsa-miR-10a-5p
HOXA10	1	hsa-miR-196a-5p
HOXA5	1	hsa-miR-196a-5p
HOXA7	1	hsa-miR-196a-5p
HOXA9	1	hsa-miR-126-3p
HOXB7	1	hsa-miR-196a-5p
HOXB8	1	hsa-miR-196a-5p
HOXC8	1	hsa-miR-196a-5p
HOXD10	1	hsa-miR-146a-5p
HOXD8	1	hsa-miR-196a-5p
HSF2	1	hsa-miR-18a-5p
HTR3E	1	hsa-miR-510-5p
ICAM1	1	hsa-miR-146a-5p
IGF1R	1	hsa-miR-141-3p
IGFBP2	1	hsa-miR-126-3p
IKBKB	1	hsa-miR-451a
IL4	1	hsa-miR-429
IL6R	1	hsa-miR-451a
IRAK1	1	hsa-miR-146a-5p
IRAK2	1	hsa-miR-146a-5p
IRF2	1	hsa-miR-18a-5p
IRS1	1	hsa-miR-126-3p
IS2	1	hsa-miR-146a-5p
ITGB8	1	hsa-miR-19b-1-5p
KDR	1	hsa-miR-19b-1-5p
KEAP1	1	hsa-miR-141-3p
KIF22	1	hsa-miR-146a-5p
KLF12	1	hsa-miR-141-3p
KLF5	1	hsa-miR-141-3p
KRT5	1	hsa-miR-196a-5p
L1CAM	1	hsa-miR-146a-5p
LAMC2	1	hsa-miR-146a-5p
LAMTOR5	1	hsa-miR-501-5p
LFNG	1	hsa-miR-146a-5p
LIMK1	1	hsa-miR-20b-5p
LRP2	1	hsa-miR-146a-5p
LRP6	1	hsa-miR-126-3p
LSP1	1	hsa-miR-196a-5p
MAMDC2	1	hsa-miR-196a-5p
MAP3K1	1	hsa-miR-451a
MAP3K7	1	hsa-miR-10a-5p
MAP4K4	1	hsa-miR-141-3p
MAPK1	1	hsa-miR-451a
MAPK14	1	hsa-miR-141-3p
MAPK8IP1	1	hsa-miR-10a-5p
MEF2D	1	hsa-miR-18a-5p
MERTK	1	hsa-miR-126-3p
MMP14	1	hsa-miR-10a-5p
MMP2	1	hsa-miR-451a
MMP7	1	hsa-miR-126-3p
MMP9	1	hsa-miR-451a
MTA2	1	hsa-miR-146a-5p
MYB	1	hsa-miR-429
MYLIP	1	hsa-miR-20b-5p
NCOA3	1	hsa-miR-18a-5p
NCOR2	1	hsa-miR-10a-5p
NEDD9	1	hsa-miR-18a-5p
NEO1	1	hsa-miR-18a-5p
NFAT5	1	hsa-miR-146a-5p
NKD1	1	hsa-miR-501-5p
NOD2	1	hsa-miR-10a-5p
NOS1	1	hsa-miR-146a-5p
NOTCH1	1	hsa-miR-146a-5p
NOTCH2	1	hsa-miR-146a-5p
NR0B2	1	hsa-miR-141-3p
NR1I2	1	hsa-miR-18a-5p
NR3C1	1	hsa-miR-18a-5p
NR4A3	1	hsa-miR-20a-3p
NRP2	1	hsa-miR-196a-5p
NTN4	1	hsa-miR-196a-5p
NUMB	1	hsa-miR-146a-5p
ONECUT2	1	hsa-miR-429
OSTF1	1	hsa-miR-429
OXTR	1	hsa-miR-451a
PA2G4	1	hsa-miR-146a-5p
PAPPA	1	hsa-miR-141-3p
PGR	1	hsa-miR-126-3p
PHLPP2	1	hsa-miR-141-3p
PIAS3	1	hsa-miR-18a-5p
PIK3R2	1	hsa-miR-126-3p
PIKFYVE	1	hsa-miR-508-3p
PITPNC1	1	hsa-miR-126-3p
PLAUR	1	hsa-miR-146a-5p
PLK2	1	hsa-miR-126-3p
PPARA	1	hsa-miR-141-3p
PPARG	1	hsa-miR-20b-5p
PRDX1	1	hsa-miR-510-5p
PRKCE	1	hsa-miR-146a-5p
PTGES2	1	hsa-miR-146a-5p
PTGS2	1	hsa-miR-146a-5p
PTPN7	1	hsa-miR-126-3p
RAB14	1	hsa-miR-451a
RAB5A	1	hsa-miR-451a
RAC1	1	hsa-miR-146a-5p
RARB	1	hsa-miR-146a-5p
RASSF8	1	hsa-miR-429
RB1CC1	1	hsa-miR-20b-5p
RBBP4	1	hsa-miR-429
RDX	1	hsa-miR-196a-5p
RERE	1	hsa-miR-429
RGS3	1	hsa-miR-126-3p
RHO	1	hsa-miR-146a-5p
RHOA	1	hsa-miR-146a-5p
RHOU	1	hsa-miR-126-3p
RNF11	1	hsa-miR-146a-5p
ROCK2	1	hsa-miR-144-5p
RUNX2	1	hsa-miR-433-3p
S100A9	1	hsa-miR-196a-5p
SDC4	1	hsa-miR-18a-5p
SERPINE1	1	hsa-miR-10a-5p
SFPQ	1	hsa-miR-141-3p
SIKE1	1	hsa-miR-146a-5p
SIRT1	1	hsa-miR-126-3p
SLC45A3	1	hsa-miR-126-3p
SLC7A5	1	hsa-miR-126-3p
SLPI	1	hsa-miR-146a-5p
SMAD3	1	hsa-miR-18a-5p
SMN1	1	hsa-miR-146a-5p
SMO	1	hsa-miR-20a-3p
SOS1	1	hsa-miR-146a-5p
SP1	1	hsa-miR-429
SPDEF	1	hsa-miR-510-5p
SPRED1	1	hsa-miR-126-3p
SPRR2C	1	hsa-miR-196a-5p
SRSF1	1	hsa-miR-10a-5p
SSSCA1	1	hsa-miR-196a-5p
STAT1	1	hsa-miR-146a-5p
STAT3	1	hsa-miR-20b-5p
STAT4	1	hsa-miR-141-3p
STAT5A	1	hsa-miR-141-3p
STK3	1	hsa-miR-141-3p
STK4	1	hsa-miR-18a-5p
TAZ	1	hsa-miR-141-3p
TBPL1	1	hsa-miR-18a-5p
TCF4	1	hsa-miR-126-3p
TEK	1	hsa-miR-126-3p
TFDP2	1	hsa-miR-141-3p
TGFB1	1	hsa-miR-146a-5p
TGFB2	1	hsa-miR-141-3p
TGIF1	1	hsa-miR-144-5p
TIAM1	1	hsa-miR-141-3p
TIMP2	1	hsa-miR-429
TLR2	1	hsa-miR-146a-5p
TLR4	1	hsa-miR-146a-5p
TM4SF1	1	hsa-miR-141-3p
TMED7	1	hsa-miR-451a
TNFAIP3	1	hsa-miR-18a-5p
TNFSF11	1	hsa-miR-18a-5p
TOM1	1	hsa-miR-126-3p
TRA2B	1	hsa-miR-10a-5p
TRAF6	1	hsa-miR-146a-5p
TRAPPC2B	1	hsa-miR-141-3p
TSC1	1	hsa-miR-451a
TWF1	1	hsa-miR-126-3p
TWF2	1	hsa-miR-126-3p
UBAP1	1	hsa-miR-141-3p
UHRF1	1	hsa-miR-146a-5p
USF2	1	hsa-miR-10a-5p
VCAM1	1	hsa-miR-126-3p
WASF2	1	hsa-miR-146a-5p
WASF3	1	hsa-miR-429
XIAP	1	hsa-miR-429
YAP1	1	hsa-miR-141-3p
YWHAG	1	hsa-miR-141-3p
ZMPSTE24	1	hsa-miR-141-3p
