# Supplementary material for: Identification of Epigenetic Interactions between MicroRNA and DNA Methylation Associated with Polycystic Ovarian Syndrome
Source: Preprints.org preprint supplement (doi:10.20944/preprints201910.0191.v1), 2019-10-17
Supplement: Supplementary file 6 [file Table S6 Differential methylation of miRNA promoter regions.xlsx]

## Sheet: Sheet 1
miRNA	Chromosome	promoter_start	promoter_end	logFC_miRNA	methylation_start	methylation_end	logFC_methylation
hsa-miR-141-3p	chr12	6963126	6963326	-3.05907	6962551	6963600	1.36321
hsa-miR-126-3p	chr9	136662901	136663017	-1.91973	136662901	136663650	1.09988
hsa-miR-429	chr1	1162777	1162977	-1.60067	1162651	1165350	1.5745
hsa-let-7f-2-3p	chrX	53683929	53684129	0.239194	53683351	53684550	1.52742
hsa-let-7f-5p	chrX	53683929	53684129	0.196452	53683351	53684550	1.52742
hsa-miR-1185-5p	chr14	100826018	100826100	-2.21402	100825651	100826100	1.21606
hsa-miR-1197	chr14	100826018	100826100	-1.24387	100825651	100826100	1.21606
hsa-miR-126-5p	chr9	136662901	136663017	1.96049	136662901	136663650	1.09988
hsa-miR-127-3p	chr14	100826018	100826100	-0.341573	100825651	100826100	1.21606
hsa-miR-127-5p	chr14	100826018	100826100	-0.676105	100825651	100826100	1.21606
hsa-miR-1277-3p	chrX	118346037	118346237	0.83083	118345651	118347000	1.6212
hsa-miR-1277-5p	chrX	118346037	118346237	0.0541569	118345651	118347000	1.6212
hsa-miR-134-3p	chr14	100826018	100826100	-0.961144	100825651	100826100	1.21606
hsa-miR-134-5p	chr14	100826018	100826100	-0.28658	100825651	100826100	1.21606
hsa-miR-136-3p	chr14	100826018	100826100	-0.578171	100825651	100826100	1.21606
hsa-miR-136-5p	chr14	100826018	100826100	-0.127916	100825651	100826100	1.21606
hsa-miR-137-3p	chr1	98049771	98049900	0.492424	98049751	98049900	-2.57778
hsa-miR-141-5p	chr12	6963126	6963326	0.529333	6962551	6963600	1.36321
hsa-miR-142-3p	chr17	58332420	58332620	1.6221	58332151	58332750	1.48279
hsa-miR-142-5p	chr17	58332420	58332620	2.07663	58332151	58332750	1.48279
hsa-miR-143-3p	chr5	149406901	149406978	-0.328095	149406901	149407050	-1.86655
hsa-miR-145-3p	chr5	149406901	149406978	0.122718	149406901	149407050	-1.86655
hsa-miR-145-5p	chr5	149406901	149406978	0.575201	149406901	149407050	-1.86655
hsa-miR-154-3p	chr14	100826018	100826100	-0.498431	100825651	100826100	1.21606
hsa-miR-154-5p	chr14	100826018	100826100	-0.240257	100825651	100826100	1.21606
hsa-miR-188-3p	chrX	49922547	49922747	3.2813	49922251	49923450	1.74232
hsa-miR-195-3p	chr17	7019701	7019759	-0.201406	7019701	7019850	-2.64222
hsa-miR-195-5p	chr17	7019701	7019759	0.444133	7019701	7019850	-2.64222
hsa-miR-196a-5p	chr12	53986542	53986650	3.57276	53986501	53986650	1.84746
hsa-miR-199a-5p	chr19	10817557	10817757	0.678334	10817401	10818000	1.52061
hsa-miR-19b-3p	chrX	134173943	134173950	0.507097	134173801	134173950	1.04457
hsa-miR-200a-3p	chr1	1162777	1162977	1.02583	1162651	1165350	1.5745
hsa-miR-200b-3p	chr1	1162777	1162977	0.94466	1162651	1165350	1.5745
hsa-miR-200b-5p	chr1	1162777	1162977	1.06953	1162651	1165350	1.5745
hsa-miR-200c-3p	chr12	6963126	6963326	0.782226	6962551	6963600	1.36321
hsa-miR-20b-5p	chrX	134173943	134173950	2.30011	134173801	134173950	1.04457
hsa-miR-216a-5p	chr2	55989487	55989687	1.12601	55989151	55989750	-1.98451
hsa-miR-296-3p	chr20	58850778	58850978	-0.187461	58850701	58853550	1.54986
hsa-miR-296-5p	chr20	58850778	58850978	0.215855	58850701	58853550	1.54986
hsa-miR-299-3p	chr14	100826018	100826100	-0.349241	100825651	100826100	1.21606
hsa-miR-299-5p	chr14	100826018	100826100	-0.229046	100825651	100826100	1.21606
hsa-miR-323a-3p	chr14	100826018	100826100	-0.218437	100825651	100826100	1.21606
hsa-miR-323b-3p	chr14	100826018	100826100	-0.258291	100825651	100826100	1.21606
hsa-miR-329-3p	chr14	100826018	100826100	-0.151829	100825651	100826100	1.21606
hsa-miR-335-3p	chr7	130491986	130492186	1.31138	130491001	130493250	1.57717
hsa-miR-335-5p	chr7	130491986	130492186	0.645174	130491001	130493250	1.57717
hsa-miR-337-3p	chr14	100826018	100826100	-0.121917	100825651	100826100	1.21606
hsa-miR-337-5p	chr14	100826018	100826100	0.330636	100825651	100826100	1.21606
hsa-miR-338-5p	chr17	81128784	81128984	-0.333326	81128251	81129000	1.45394
hsa-miR-34a-3p	chr1	9162901	9163033	-0.207739	9162901	9163050	-1.9585
hsa-miR-34a-5p	chr1	9162901	9163033	0.0593963	9162901	9163050	-1.9585
hsa-miR-361-3p	chrX	86047454	86047500	-0.225487	86047201	86047500	1.81439
hsa-miR-361-5p	chrX	86047454	86047500	0.293192	86047201	86047500	1.81439
hsa-miR-362-3p	chrX	49922547	49922747	1.27614	49922251	49923450	1.74232
hsa-miR-362-5p	chrX	49922547	49922747	0.696301	49922251	49923450	1.74232
hsa-miR-363-3p	chrX	134173943	134173950	1.65679	134173801	134173950	1.04457
hsa-miR-369-3p	chr14	100826018	100826100	-0.570479	100825651	100826100	1.21606
hsa-miR-369-5p	chr14	100826018	100826100	-0.697893	100825651	100826100	1.21606
hsa-miR-370-3p	chr14	100826018	100826100	-0.37575	100825651	100826100	1.21606
hsa-miR-370-5p	chr14	100826018	100826100	-0.964778	100825651	100826100	1.21606
hsa-miR-376a-3p	chr14	100826018	100826100	0.346839	100825651	100826100	1.21606
hsa-miR-376a-5p	chr14	100826018	100826100	-0.490889	100825651	100826100	1.21606
hsa-miR-376b-3p	chr14	100826018	100826100	-0.200597	100825651	100826100	1.21606
hsa-miR-376c-3p	chr14	100826018	100826100	0.0584287	100825651	100826100	1.21606
hsa-miR-377-3p	chr14	100826018	100826100	-0.0863608	100825651	100826100	1.21606
hsa-miR-377-5p	chr14	100826018	100826100	-0.228147	100825651	100826100	1.21606
hsa-miR-379-3p	chr14	100826018	100826100	-0.578757	100825651	100826100	1.21606
hsa-miR-379-5p	chr14	100826018	100826100	-0.371973	100825651	100826100	1.21606
hsa-miR-380-3p	chr14	100826018	100826100	0.325018	100825651	100826100	1.21606
hsa-miR-381-3p	chr14	100826018	100826100	-0.596809	100825651	100826100	1.21606
hsa-miR-382-3p	chr14	100826018	100826100	-0.194041	100825651	100826100	1.21606
hsa-miR-382-5p	chr14	100826018	100826100	-0.613682	100825651	100826100	1.21606
hsa-miR-409-3p	chr14	100826018	100826100	-0.330992	100825651	100826100	1.21606
hsa-miR-409-5p	chr14	100826018	100826100	-0.279997	100825651	100826100	1.21606
hsa-miR-410-3p	chr14	100826018	100826100	-0.396856	100825651	100826100	1.21606
hsa-miR-411-3p	chr14	100826018	100826100	1.08266	100825651	100826100	1.21606
hsa-miR-411-5p	chr14	100826018	100826100	-0.746886	100825651	100826100	1.21606
hsa-miR-412-5p	chr14	100826018	100826100	-1.23252	100825651	100826100	1.21606
hsa-miR-424-3p	chrX	134549544	134549744	-0.450691	134549251	134550300	1.46212
hsa-miR-424-5p	chrX	134549544	134549744	-0.326358	134549251	134550300	1.46212
hsa-miR-431-3p	chr14	100826018	100826100	-1.25744	100825651	100826100	1.21606
hsa-miR-431-5p	chr14	100826018	100826100	-1.16299	100825651	100826100	1.21606
hsa-miR-432-5p	chr14	100826018	100826100	-0.189193	100825651	100826100	1.21606
hsa-miR-433-3p	chr14	100826018	100826100	-1.37133	100825651	100826100	1.21606
hsa-miR-450a-1-3p	chrX	134549544	134549744	-0.047313	134549251	134550300	1.46212
hsa-miR-450a-2-3p	chrX	134549544	134549744	0.0737422	134549251	134550300	1.46212
hsa-miR-450a-5p	chrX	134549544	134549744	-0.163483	134549251	134550300	1.46212
hsa-miR-450b-5p	chrX	134549544	134549744	0.0470831	134549251	134550300	1.46212
hsa-miR-485-3p	chr14	100826018	100826100	-0.546916	100825651	100826100	1.21606
hsa-miR-485-5p	chr14	100826018	100826100	-1.01575	100825651	100826100	1.21606
hsa-miR-487a-3p	chr14	100826018	100826100	-1.06764	100825651	100826100	1.21606
hsa-miR-487a-5p	chr14	100826018	100826100	0.313362	100825651	100826100	1.21606
hsa-miR-487b-3p	chr14	100826018	100826100	-0.924929	100825651	100826100	1.21606
hsa-miR-493-3p	chr14	100826018	100826100	-0.805702	100825651	100826100	1.21606
hsa-miR-493-5p	chr14	100826018	100826100	-0.74732	100825651	100826100	1.21606
hsa-miR-494-3p	chr14	100826018	100826100	-0.64223	100825651	100826100	1.21606
hsa-miR-495-3p	chr14	100826018	100826100	-0.222457	100825651	100826100	1.21606
hsa-miR-496	chr14	100826018	100826100	0.194986	100825651	100826100	1.21606
hsa-miR-497-5p	chr17	7019701	7019759	0.0116181	7019701	7019850	-2.64222
hsa-miR-500a-3p	chrX	49922547	49922747	0.154367	49922251	49923450	1.74232
hsa-miR-500a-5p	chrX	49922547	49922747	0.25271	49922251	49923450	1.74232
hsa-miR-501-3p	chrX	49922547	49922747	0.490326	49922251	49923450	1.74232
hsa-miR-501-5p	chrX	49922547	49922747	3.01769	49922251	49923450	1.74232
hsa-miR-502-3p	chrX	49922547	49922747	0.91746	49922251	49923450	1.74232
hsa-miR-503-3p	chrX	134549544	134549744	-0.511167	134549251	134550300	1.46212
hsa-miR-503-5p	chrX	134549544	134549744	0.251734	134549251	134550300	1.46212
hsa-miR-504-5p	chrX	139204923	139205123	-0.525847	139204501	139205550	1.31847
hsa-miR-532-3p	chrX	49922547	49922747	0.327027	49922251	49923450	1.74232
hsa-miR-532-5p	chrX	49922547	49922747	0.962588	49922251	49923450	1.74232
hsa-miR-539-3p	chr14	100826018	100826100	-0.32532	100825651	100826100	1.21606
hsa-miR-542-3p	chrX	134549544	134549744	0.243452	134549251	134550300	1.46212
hsa-miR-542-5p	chrX	134549544	134549744	-0.0404834	134549251	134550300	1.46212
hsa-miR-543	chr14	100826018	100826100	-0.654508	100825651	100826100	1.21606
hsa-miR-652-3p	chrX	110003014	110003214	0.739003	110002951	110003550	1.21279
hsa-miR-652-5p	chrX	110003014	110003214	-1.33426	110002951	110003550	1.21279
hsa-miR-654-3p	chr14	100826018	100826100	-0.578661	100825651	100826100	1.21606
hsa-miR-654-5p	chr14	100826018	100826100	-0.237057	100825651	100826100	1.21606
hsa-miR-655-3p	chr14	100826018	100826100	-0.185695	100825651	100826100	1.21606
hsa-miR-656-3p	chr14	100826018	100826100	-0.202277	100825651	100826100	1.21606
hsa-miR-660-5p	chrX	49922547	49922747	0.92479	49922251	49923450	1.74232
hsa-miR-664b-3p	chrX	154762773	154762973	-0.577501	154762501	154763700	1.56291
hsa-miR-664b-5p	chrX	154762773	154762973	-0.961014	154762501	154763700	1.56291
hsa-miR-665	chr14	100826018	100826100	0.817082	100825651	100826100	1.21606
hsa-miR-758-3p	chr14	100826018	100826100	-0.747047	100825651	100826100	1.21606
hsa-miR-766-3p	chrX	119693101	119693250	0.0267208	119693101	119693250	1.22234
hsa-miR-770-5p	chr14	100826018	100826100	-0.177383	100825651	100826100	1.21606
hsa-miR-889-3p	chr14	100826018	100826100	-0.492089	100825651	100826100	1.21606
hsa-miR-92a-3p	chrX	134173943	134173950	0.172093	134173801	134173950	1.04457
hsa-miR-98-3p	chrX	53683929	53684129	0.0100215	53683351	53684550	1.52742
hsa-miR-98-5p	chrX	53683929	53684129	0.571742	53683351	53684550	1.52742

## Sheet: Sheet2
miRNA	Chromosome	promoter_start	promoter_end	logFC_miRNA	methylation_start	methylation_end	logFC_methylation
hsa-miR-141-3p	chr12	6963126	6963326	-3.05907	6962551	6963600	1.36321
hsa-miR-126-3p	chr9	136662901	136663017	-1.91973	136662901	136663650	1.09988
hsa-miR-429	chr1	1162777	1162977	-1.60067	1162651	1165350	1.5745
hsa-let-7f-2-3p	chrX	53683929	53684129	0.239194	53683351	53684550	1.52742
hsa-let-7f-5p	chrX	53683929	53684129	0.196452	53683351	53684550	1.52742
hsa-miR-1185-5p	chr14	100826018	100826100	-2.21402	100825651	100826100	1.21606
hsa-miR-1197	chr14	100826018	100826100	-1.24387	100825651	100826100	1.21606
hsa-miR-216a-5p	chr2	55989487	55989687	1.12601	55989151	55989750	-1.98451
hsa-miR-412-5p	chr14	100826018	100826100	-1.23252	100825651	100826100	1.21606
hsa-miR-424-3p	chrX	134549544	134549744	-0.450691	134549251	134550300	1.46212
hsa-miR-424-5p	chrX	134549544	134549744	-0.326358	134549251	134550300	1.46212
hsa-miR-431-3p	chr14	100826018	100826100	-1.25744	100825651	100826100	1.21606
hsa-miR-431-5p	chr14	100826018	100826100	-1.16299	100825651	100826100	1.21606
hsa-miR-432-5p	chr14	100826018	100826100	-0.189193	100825651	100826100	1.21606
hsa-miR-433-3p	chr14	100826018	100826100	-1.37133	100825651	100826100	1.21606
hsa-miR-450a-1-3p	chrX	134549544	134549744	-0.047313	134549251	134550300	1.46212
hsa-miR-450a-2-3p	chrX	134549544	134549744	0.0737422	134549251	134550300	1.46212
hsa-miR-450a-5p	chrX	134549544	134549744	-0.163483	134549251	134550300	1.46212
hsa-miR-450b-5p	chrX	134549544	134549744	0.0470831	134549251	134550300	1.46212
hsa-miR-485-3p	chr14	100826018	100826100	-0.546916	100825651	100826100	1.21606
hsa-miR-485-5p	chr14	100826018	100826100	-1.01575	100825651	100826100	1.21606
hsa-miR-487a-3p	chr14	100826018	100826100	-1.06764	100825651	100826100	1.21606
hsa-miR-652-5p	chrX	110003014	110003214	-1.33426	110002951	110003550	1.21279
