# Supplementary material for: Identification of Epigenetic Interactions between MicroRNA and DNA Methylation Associated with Polycystic Ovarian Syndrome
Source: Preprints.org preprint supplement (doi:10.20944/preprints201910.0191.v1), 2019-10-17
Supplement: Supplementary file 7 [file Tbale S7 Predicted target genes of miRNAs with DMPs.xlsx]

## Sheet: Sheet1
Target_gene	Count	miRNA
PTEN	12	hsa-miR-141-3p,hsa-miR-142-5p,hsa-miR-19b-3p,hsa-miR-200a-3p,hsa-miR-200c-3p,hsa-miR-20b-5p,hsa-miR-370-5p,hsa-miR-377-3p,hsa-miR-382-5p,hsa-miR-429,hsa-miR-494-3p,hsa-miR-92a-3p
VEGFA	12	hsa-miR-126-3p,hsa-miR-126-5p,hsa-miR-134-5p,hsa-miR-199a-5p,hsa-miR-200b-3p,hsa-miR-200c-3p,hsa-miR-20b-5p,hsa-miR-296-5p,hsa-miR-361-5p,hsa-miR-429,hsa-miR-503-5p,hsa-miR-504-5p
ZEB1	10	hsa-miR-141-3p,hsa-miR-142-5p,hsa-miR-200a-3p,hsa-miR-200b-3p,hsa-miR-200c-3p,hsa-miR-409-3p,hsa-miR-429,hsa-miR-494-3p,hsa-miR-652-3p,hsa-miR-655-3p
BCL2	9	hsa-miR-126-3p,hsa-miR-136-5p,hsa-miR-200b-3p,hsa-miR-200c-3p,hsa-miR-376c-3p,hsa-miR-429,hsa-miR-494-3p,hsa-miR-503-5p,hsa-miR-98-5p
BMI1	7	hsa-miR-200b-3p,hsa-miR-200c-3p,hsa-miR-338-5p,hsa-miR-376c-3p,hsa-miR-487b-3p,hsa-miR-494-3p,hsa-miR-495-3p
DNMT1	7	hsa-miR-126-3p,hsa-miR-19b-3p,hsa-miR-200a-3p,hsa-miR-200b-3p,hsa-miR-377-3p,hsa-miR-429,hsa-miR-92a-3p
HMGA2	7	hsa-miR-154-5p,hsa-miR-196a-5p,hsa-miR-370-3p,hsa-miR-485-5p,hsa-miR-495-3p,hsa-miR-543,hsa-miR-98-5p
KRAS	7	hsa-miR-126-3p,hsa-miR-134-5p,hsa-miR-199a-5p,hsa-miR-200c-3p,hsa-miR-433-3p,hsa-miR-487b-3p,hsa-miR-543
ZEB2	7	hsa-miR-141-3p,hsa-miR-154-5p,hsa-miR-200a-3p,hsa-miR-200b-3p,hsa-miR-200c-3p,hsa-miR-335-5p,hsa-miR-429
AKT1	6	hsa-miR-126-3p,hsa-miR-382-3p,hsa-miR-409-3p,hsa-miR-494-3p,hsa-miR-495-3p,hsa-miR-542-3p
CCNE2	6	hsa-miR-126-3p,hsa-miR-200a-3p,hsa-miR-200b-3p,hsa-miR-200c-3p,hsa-miR-503-5p,hsa-miR-664b-5p
CDKN1A	6	hsa-miR-196a-5p,hsa-miR-20b-5p,hsa-miR-299-5p,hsa-miR-363-3p,hsa-miR-503-5p,hsa-miR-654-3p
EZH2	6	hsa-miR-126-3p,hsa-miR-199a-5p,hsa-miR-200a-3p,hsa-miR-200b-3p,hsa-miR-429,hsa-miR-98-5p
HIF1A	6	hsa-miR-142-5p,hsa-miR-199a-5p,hsa-miR-20b-5p,hsa-miR-424-5p,hsa-miR-429,hsa-miR-433-3p
IGF1R	6	hsa-miR-141-3p,hsa-miR-335-5p,hsa-miR-376a-3p,hsa-miR-376c-3p,hsa-miR-494-3p,hsa-miR-503-5p
MYB	6	hsa-miR-200a-3p,hsa-miR-200b-3p,hsa-miR-200c-3p,hsa-miR-424-5p,hsa-miR-429,hsa-miR-503-5p
MYC	6	hsa-miR-126-5p,hsa-miR-335-5p,hsa-miR-429,hsa-miR-487b-3p,hsa-miR-494-3p,hsa-miR-98-5p
SEPT7	6	hsa-miR-127-3p,hsa-miR-141-3p,hsa-miR-200a-3p,hsa-miR-200b-3p,hsa-miR-200c-3p,hsa-miR-429
SIRT1	6	hsa-miR-126-3p,hsa-miR-142-5p,hsa-miR-199a-5p,hsa-miR-200c-3p,hsa-miR-543,hsa-miR-92a-3p
TGFBR2	6	hsa-miR-142-5p,hsa-miR-196a-5p,hsa-miR-19b-3p,hsa-miR-370-3p,hsa-miR-655-3p,hsa-miR-92a-3p
BAP1	5	hsa-miR-141-3p,hsa-miR-200a-3p,hsa-miR-200b-3p,hsa-miR-200c-3p,hsa-miR-429
CRKL	5	hsa-miR-126-3p,hsa-miR-200b-3p,hsa-miR-200c-3p,hsa-miR-335-5p,hsa-miR-429
E2F3	5	hsa-miR-141-3p,hsa-miR-200b-3p,hsa-miR-200c-3p,hsa-miR-377-3p,hsa-miR-503-5p
ELMO2	5	hsa-miR-141-3p,hsa-miR-200a-3p,hsa-miR-200b-3p,hsa-miR-200c-3p,hsa-miR-429
ERBIN	5	hsa-miR-141-3p,hsa-miR-200a-3p,hsa-miR-200b-3p,hsa-miR-200c-3p,hsa-miR-429
GRB2	5	hsa-miR-200a-3p,hsa-miR-329-3p,hsa-miR-376c-3p,hsa-miR-411-5p,hsa-miR-433-3p
HOXB5	5	hsa-miR-141-3p,hsa-miR-200a-3p,hsa-miR-200b-3p,hsa-miR-200c-3p,hsa-miR-429
KLF11	5	hsa-miR-141-3p,hsa-miR-200a-3p,hsa-miR-200b-3p,hsa-miR-200c-3p,hsa-miR-429
KLHL20	5	hsa-miR-141-3p,hsa-miR-200a-3p,hsa-miR-200b-3p,hsa-miR-200c-3p,hsa-miR-429
MALAT1	5	hsa-miR-141-3p,hsa-miR-200a-3p,hsa-miR-200b-3p,hsa-miR-200c-3p,hsa-miR-429
NOTCH1	5	hsa-miR-200b-3p,hsa-miR-200c-3p,hsa-miR-296-5p,hsa-miR-363-3p,hsa-miR-410-3p
PTPRD	5	hsa-miR-141-3p,hsa-miR-200a-3p,hsa-miR-200b-3p,hsa-miR-200c-3p,hsa-miR-429
RASSF2	5	hsa-miR-141-3p,hsa-miR-200a-3p,hsa-miR-200b-3p,hsa-miR-200c-3p,hsa-miR-429
RIN2	5	hsa-miR-141-3p,hsa-miR-200a-3p,hsa-miR-200b-3p,hsa-miR-200c-3p,hsa-miR-429
SHC1	5	hsa-miR-141-3p,hsa-miR-200a-3p,hsa-miR-200b-3p,hsa-miR-200c-3p,hsa-miR-429
SMAD3	5	hsa-miR-142-5p,hsa-miR-199a-5p,hsa-miR-200a-3p,hsa-miR-323a-3p,hsa-miR-424-5p
TCF7L1	5	hsa-miR-141-3p,hsa-miR-200a-3p,hsa-miR-200b-3p,hsa-miR-200c-3p,hsa-miR-429
VAC14	5	hsa-miR-141-3p,hsa-miR-200a-3p,hsa-miR-200b-3p,hsa-miR-200c-3p,hsa-miR-429
WDR37	5	hsa-miR-141-3p,hsa-miR-200a-3p,hsa-miR-200b-3p,hsa-miR-200c-3p,hsa-miR-429
ZFPM2	5	hsa-miR-141-3p,hsa-miR-200a-3p,hsa-miR-200b-3p,hsa-miR-200c-3p,hsa-miR-429
ACVR1C	4	hsa-miR-376a-3p,hsa-miR-376a-5p,hsa-miR-376b-3p,hsa-miR-376c-3p
BCL2L11	4	hsa-miR-19b-3p,hsa-miR-363-3p,hsa-miR-494-3p,hsa-miR-92a-3p
DLC1	4	hsa-miR-200a-3p,hsa-miR-200b-3p,hsa-miR-200c-3p,hsa-miR-429
FBXW7	4	hsa-miR-363-3p,hsa-miR-503-5p,hsa-miR-770-5p,hsa-miR-92a-3p
IKBKB	4	hsa-miR-199a-5p,hsa-miR-200b-3p,hsa-miR-200c-3p,hsa-miR-503-5p
MAGI2	4	hsa-miR-134-5p,hsa-miR-487a-3p,hsa-miR-487b-3p,hsa-miR-655-3p
PIK3R1	4	hsa-miR-376a-3p,hsa-miR-487a-3p,hsa-miR-503-5p,hsa-miR-542-3p
SMAD2	4	hsa-miR-200a-3p,hsa-miR-200b-3p,hsa-miR-323a-3p,hsa-miR-503-3p
SP1	4	hsa-miR-200b-3p,hsa-miR-200c-3p,hsa-miR-335-5p,hsa-miR-429
TGFB2	4	hsa-miR-141-3p,hsa-miR-142-5p,hsa-miR-199a-5p,hsa-miR-200a-3p
TP53	4	hsa-miR-19b-3p,hsa-miR-200a-3p,hsa-miR-377-3p,hsa-miR-504-5p
TWIST1	4	hsa-miR-361-5p,hsa-miR-381-3p,hsa-miR-543,hsa-miR-98-3p
ARID4B	3	hsa-miR-19b-3p,hsa-miR-20b-5p,hsa-miR-92a-3p
ATF6	3	hsa-miR-199a-5p,hsa-miR-424-5p,hsa-miR-503-5p
BIRC5	3	hsa-miR-335-5p,hsa-miR-494-3p,hsa-miR-542-3p
CCND1	3	hsa-let-7f-5p,hsa-miR-424-5p,hsa-miR-503-5p
CD274	3	hsa-miR-200b-3p,hsa-miR-338-5p,hsa-miR-665
CDC25A	3	hsa-miR-141-3p,hsa-miR-424-5p,hsa-miR-503-5p
CDK6	3	hsa-miR-200a-3p,hsa-miR-424-5p,hsa-miR-494-3p
CREB1	3	hsa-miR-200b-3p,hsa-miR-363-3p,hsa-miR-433-3p
CXCR4	3	hsa-miR-126-3p,hsa-miR-335-5p,hsa-miR-494-3p
CYLD	3	hsa-miR-126-5p,hsa-miR-362-5p,hsa-miR-500a-5p
CYP19A1	3	hsa-let-7f-5p,hsa-miR-19b-3p,hsa-miR-98-5p
DKK1	3	hsa-miR-335-5p,hsa-miR-493-3p,hsa-miR-501-5p
DNMT3A	3	hsa-miR-200b-3p,hsa-miR-200c-3p,hsa-miR-369-5p
DNMT3B	3	hsa-miR-200b-3p,hsa-miR-200c-3p,hsa-miR-369-5p
E2F1	3	hsa-miR-329-3p,hsa-miR-362-3p,hsa-miR-98-5p
E2F5	3	hsa-miR-154-5p,hsa-miR-98-3p,hsa-miR-98-5p
ESR1	3	hsa-miR-19b-3p,hsa-miR-20b-5p,hsa-miR-335-3p
ETS1	3	hsa-miR-199a-5p,hsa-miR-200b-3p,hsa-miR-200c-3p
FGFR1	3	hsa-miR-296-5p,hsa-miR-424-5p,hsa-miR-503-5p
FOXO1	3	hsa-miR-196a-5p,hsa-miR-200c-3p,hsa-miR-370-3p
HFE	3	hsa-miR-200a-3p,hsa-miR-200b-3p,hsa-miR-200c-3p
HIPK3	3	hsa-miR-19b-3p,hsa-miR-20b-5p,hsa-miR-92a-3p
HMGA1	3	hsa-miR-142-3p,hsa-miR-196a-5p,hsa-miR-296-5p
HOXA10	3	hsa-miR-142-3p,hsa-miR-196a-5p,hsa-miR-494-3p
IL6	3	hsa-let-7f-5p,hsa-miR-136-5p,hsa-miR-98-5p
KDR	3	hsa-miR-200b-3p,hsa-miR-200c-3p,hsa-miR-296-5p
KEAP1	3	hsa-miR-141-3p,hsa-miR-141-5p,hsa-miR-200a-3p
MET	3	hsa-miR-409-3p,hsa-miR-410-3p,hsa-miR-433-3p
MGMT	3	hsa-miR-127-3p,hsa-miR-370-3p,hsa-miR-409-3p
MMP7	3	hsa-miR-126-3p,hsa-miR-126-5p,hsa-miR-543
MYLIP	3	hsa-miR-19b-3p,hsa-miR-20b-5p,hsa-miR-92a-3p
NFKBIA	3	hsa-miR-126-3p,hsa-miR-196a-5p,hsa-miR-381-3p
NOS3	3	hsa-miR-200c-3p,hsa-miR-335-3p,hsa-miR-543
PHLPP1	3	hsa-miR-141-3p,hsa-miR-200b-3p,hsa-miR-92a-3p
PIN1	3	hsa-miR-200b-3p,hsa-miR-200c-3p,hsa-miR-296-5p
RHOA	3	hsa-miR-200b-3p,hsa-miR-200b-5p,hsa-miR-200c-3p
ROCK2	3	hsa-miR-142-3p,hsa-miR-200b-3p,hsa-miR-200c-3p
RUNX2	3	hsa-miR-335-5p,hsa-miR-376c-3p,hsa-miR-433-3p
SOX2	3	hsa-miR-126-3p,hsa-miR-429,hsa-miR-450b-5p
SOX4	3	hsa-miR-335-5p,hsa-miR-363-3p,hsa-miR-369-3p
STAT3	3	hsa-miR-20b-5p,hsa-miR-337-3p,hsa-miR-92a-3p
SUZ12	3	hsa-miR-200b-3p,hsa-miR-200c-3p,hsa-miR-487b-3p
TGFBR1	3	hsa-miR-142-3p,hsa-miR-199a-5p,hsa-miR-376c-3p
TRAPPC2B	3	hsa-miR-141-3p,hsa-miR-200a-3p,hsa-miR-532-5p
UGT2B17	3	hsa-miR-376c-3p,hsa-miR-409-3p,hsa-miR-494-3p
WASF3	3	hsa-miR-200a-3p,hsa-miR-200b-3p,hsa-miR-429
WEE1	3	hsa-miR-381-3p,hsa-miR-424-5p,hsa-miR-503-5p
WNT5A	3	hsa-miR-154-3p,hsa-miR-154-5p,hsa-miR-487b-3p
XIAP	3	hsa-miR-200b-3p,hsa-miR-200c-3p,hsa-miR-429
YAP1	3	hsa-miR-141-3p,hsa-miR-200a-3p,hsa-miR-424-3p
ABCG2	2	hsa-miR-142-3p,hsa-miR-487a-3p
ACVR2B	2	hsa-miR-141-3p,hsa-miR-200c-3p
ADAM12	2	hsa-miR-200b-3p,hsa-miR-200c-3p
ADAM9	2	hsa-miR-126-3p,hsa-miR-126-5p
AGO1	2	hsa-let-7f-5p,hsa-miR-503-5p
ANLN	2	hsa-miR-424-5p,hsa-miR-503-5p
ARNTL	2	hsa-miR-142-3p,hsa-miR-494-3p
ATG12	2	hsa-miR-200b-3p,hsa-miR-200b-5p
ATG4C	2	hsa-miR-376a-3p,hsa-miR-376b-3p
ATRX	2	hsa-miR-200a-3p,hsa-miR-200c-3p
BCAR1	2	hsa-miR-329-3p,hsa-miR-362-3p
BECN1	2	hsa-miR-199a-5p,hsa-miR-376b-3p
BMPR2	2	hsa-miR-19b-3p,hsa-miR-92a-3p
BRCA1	2	hsa-miR-20b-5p,hsa-miR-335-5p
BTC	2	hsa-miR-200b-3p,hsa-miR-200c-3p
CASP3	2	hsa-miR-363-3p,hsa-miR-98-5p
CASP8	2	hsa-miR-296-5p,hsa-miR-376a-3p
CBL	2	hsa-miR-188-3p,hsa-miR-98-5p
CCL2	2	hsa-miR-495-3p,hsa-miR-98-5p
CCND2	2	hsa-miR-154-5p,hsa-miR-98-5p
CCND3	2	hsa-miR-424-5p,hsa-miR-503-5p
CCNE1	2	hsa-miR-424-5p,hsa-miR-503-5p
CCNF	2	hsa-miR-424-5p,hsa-miR-503-5p
CDC14A	2	hsa-miR-424-5p,hsa-miR-503-5p
CDH1	2	hsa-miR-199a-5p,hsa-miR-92a-3p
CDK2	2	hsa-miR-200c-3p,hsa-miR-376a-3p
CDKN1B	2	hsa-miR-196a-5p,hsa-miR-200b-3p
CFTR	2	hsa-miR-433-3p,hsa-miR-494-3p
CHEK1	2	hsa-miR-424-5p,hsa-miR-503-5p
CRK	2	hsa-miR-126-3p,hsa-miR-126-5p
CTNNB1	2	hsa-miR-200a-3p,hsa-miR-370-3p
CTNND1	2	hsa-miR-409-3p,hsa-miR-98-5p
CXCL12	2	hsa-miR-126-3p,hsa-miR-126-5p
DLX5	2	hsa-miR-141-3p,hsa-miR-200a-3p
DRD1	2	hsa-miR-382-5p,hsa-miR-504-5p
EDN1	2	hsa-miR-199a-5p,hsa-miR-98-5p
EGFR	2	hsa-miR-200a-3p,hsa-miR-542-5p
ERBB2	2	hsa-miR-134-5p,hsa-miR-199a-5p
FASN	2	hsa-miR-424-5p,hsa-miR-532-5p
FGF2	2	hsa-miR-424-5p,hsa-miR-503-5p
FLT1	2	hsa-miR-200b-3p,hsa-miR-200c-3p
FN1	2	hsa-miR-200b-3p,hsa-miR-200c-3p
FOXA2	2	hsa-miR-200a-3p,hsa-miR-335-5p
FOXM1	2	hsa-miR-134-5p,hsa-miR-370-3p
FSCN1	2	hsa-miR-200b-3p,hsa-miR-429
FZD4	2	hsa-miR-199a-5p,hsa-miR-493-3p
FZD6	2	hsa-miR-199a-5p,hsa-miR-20b-5p
FZD7	2	hsa-miR-485-5p,hsa-miR-542-3p
GATA4	2	hsa-miR-200b-3p,hsa-miR-200c-3p
GEMIN2	2	hsa-miR-200a-3p,hsa-miR-200c-3p
GJA1	2	hsa-miR-200a-3p,hsa-miR-381-3p
GSK3B	2	hsa-miR-199a-5p,hsa-miR-501-5p
HIPK1	2	hsa-miR-19b-3p,hsa-miR-92a-3p
HK2	2	hsa-miR-199a-5p,hsa-miR-98-5p
HMGB1	2	hsa-miR-142-3p,hsa-miR-200a-3p
HNRNPA3	2	hsa-miR-200b-3p,hsa-miR-494-3p
HOXA7	2	hsa-miR-142-3p,hsa-miR-196a-5p
HOXA9	2	hsa-miR-126-3p,hsa-miR-142-3p
HOXB7	2	hsa-miR-196a-5p,hsa-miR-337-5p
HSPA5	2	hsa-miR-199a-5p,hsa-miR-495-3p
ICAM1	2	hsa-miR-141-5p,hsa-miR-296-3p
IL13	2	hsa-let-7f-5p,hsa-miR-98-5p
ITPR1	2	hsa-miR-424-5p,hsa-miR-494-3p
JAG1	2	hsa-miR-199a-5p,hsa-miR-410-3p
KAT2B	2	hsa-miR-19b-3p,hsa-miR-92a-3p
LPAR1	2	hsa-miR-200c-3p,hsa-miR-338-5p
MAP2K1	2	hsa-miR-424-5p,hsa-miR-494-3p
MAPK1	2	hsa-miR-329-3p,hsa-miR-335-5p
MAPK14	2	hsa-miR-141-3p,hsa-miR-200a-3p
MAPK9	2	hsa-miR-141-3p,hsa-miR-20b-5p
MAT1A	2	hsa-miR-485-3p,hsa-miR-495-3p
MDM2	2	hsa-miR-410-3p,hsa-miR-504-5p
MERTK	2	hsa-miR-126-3p,hsa-miR-335-5p
MPL	2	hsa-let-7f-5p,hsa-miR-98-5p
MSN	2	hsa-miR-200b-3p,hsa-miR-200c-3p
MTDH	2	hsa-miR-136-5p,hsa-miR-542-3p
MXD1	2	hsa-miR-19b-3p,hsa-miR-382-5p
NCOA3	2	hsa-miR-19b-3p,hsa-miR-98-5p
NFIA	2	hsa-miR-382-5p,hsa-miR-424-5p
NKD1	2	hsa-miR-501-5p,hsa-miR-532-5p
NRAS	2	hsa-miR-98-3p,hsa-miR-98-5p
PAK1	2	hsa-miR-377-3p,hsa-miR-98-5p
PBX3	2	hsa-miR-495-3p,hsa-miR-98-5p
PPARGC1A	2	hsa-miR-485-3p,hsa-miR-485-5p
PRDM1	2	hsa-let-7f-5p,hsa-miR-127-3p
PROM1	2	hsa-miR-142-3p,hsa-miR-200b-5p
PTK2	2	hsa-miR-379-5p,hsa-miR-543
PTPN7	2	hsa-miR-126-3p,hsa-miR-126-5p
RAB21	2	hsa-miR-199a-5p,hsa-miR-200b-3p
RAC1	2	hsa-miR-142-3p,hsa-miR-142-5p
RDX	2	hsa-miR-196a-5p,hsa-miR-409-3p
RERE	2	hsa-miR-200b-3p,hsa-miR-429
RHOC	2	hsa-miR-493-3p,hsa-miR-493-5p
RND3	2	hsa-miR-200b-3p,hsa-miR-200c-3p
RNF2	2	hsa-miR-200b-3p,hsa-miR-200c-3p
ROCK1	2	hsa-miR-126-3p,hsa-miR-335-5p
RSU1	2	hsa-miR-409-3p,hsa-miR-409-5p
RUNX3	2	hsa-miR-495-3p,hsa-miR-532-5p
SEC23A	2	hsa-miR-200b-3p,hsa-miR-200c-3p
SLC16A1	2	hsa-miR-376a-3p,hsa-miR-376a-5p
SLC45A3	2	hsa-miR-126-3p,hsa-miR-126-5p
SMAD4	2	hsa-miR-199a-5p,hsa-miR-19b-3p
SNAI1	2	hsa-miR-199a-5p,hsa-miR-410-3p
SOCS1	2	hsa-miR-142-5p,hsa-miR-19b-3p
SPAG9	2	hsa-miR-141-5p,hsa-miR-200a-3p
SPP1	2	hsa-miR-127-5p,hsa-miR-299-5p
SPRED1	2	hsa-miR-126-3p,hsa-miR-126-5p
SRSF11	2	hsa-miR-376a-3p,hsa-miR-376a-5p
STAG2	2	hsa-miR-409-3p,hsa-miR-409-5p
STAT5A	2	hsa-miR-141-3p,hsa-miR-296-3p
TBC1D9	2	hsa-miR-381-3p,hsa-miR-495-3p
TCEAL1	2	hsa-miR-370-3p,hsa-miR-504-5p
TFAM	2	hsa-miR-200a-3p,hsa-miR-494-3p
TIAM1	2	hsa-miR-141-3p,hsa-miR-329-3p
TIMP2	2	hsa-miR-200c-3p,hsa-miR-429
TLR2	2	hsa-miR-154-5p,hsa-miR-19b-3p
TTK	2	hsa-miR-376a-3p,hsa-miR-376a-5p
TYMS	2	hsa-miR-196a-5p,hsa-miR-433-3p
WNK1	2	hsa-miR-141-5p,hsa-miR-199a-5p
ABCB1	1	hsa-miR-495-3p
ABCC1	1	hsa-miR-134-5p
ABCE1	1	hsa-miR-299-3p
ACVR1B	1	hsa-miR-199a-5p
ADAM10	1	hsa-miR-655-3p
ADAR	1	hsa-miR-432-5p
ADGRE5	1	hsa-miR-126-3p
ADM	1	hsa-miR-126-3p
AGO2	1	hsa-miR-376a-3p
AGTR1	1	hsa-miR-410-3p
AKT3	1	hsa-miR-20b-5p
AMFR	1	hsa-miR-376a-5p
ANG	1	hsa-miR-409-3p
ANGPT2	1	hsa-miR-542-3p
ANGPTL4	1	hsa-miR-134-5p
ANO1	1	hsa-miR-381-3p
ANXA1	1	hsa-miR-196a-5p
APC	1	hsa-miR-142-3p
APOA5	1	hsa-miR-485-5p
APOE	1	hsa-miR-199a-5p
AREG	1	hsa-miR-200a-3p
ARHGAP12	1	hsa-miR-199a-5p
ARHGAP5	1	hsa-miR-494-3p
ARHGEF19	1	hsa-miR-503-5p
ARPC5L	1	hsa-miR-335-5p
ATF3	1	hsa-miR-494-3p
ATG5	1	hsa-miR-299-5p
ATP7A	1	hsa-miR-495-3p
ATXN1	1	hsa-miR-19b-3p
AZIN1	1	hsa-miR-433-3p
BACE1	1	hsa-miR-19b-3p
BACH1	1	hsa-miR-196a-5p
BACH2	1	hsa-miR-142-5p
BAG1	1	hsa-miR-494-3p
BAG5	1	hsa-miR-127-3p
BAMBI	1	hsa-miR-20b-5p
BAX	1	hsa-miR-766-3p
BBC3	1	hsa-miR-296-5p
BCL2L2	1	hsa-miR-335-5p
BCL3	1	hsa-miR-19b-3p
BCL6	1	hsa-miR-127-3p
Becn1	1	hsa-miR-142-5p
BLVRB	1	hsa-miR-127-5p
BMP7	1	hsa-miR-542-3p
BMPR1A	1	hsa-miR-656-3p
BOD1	1	hsa-miR-142-3p
BRD3	1	hsa-miR-141-3p
BRD4	1	hsa-miR-329-3p
BRD7	1	hsa-miR-200c-3p
BUB1	1	hsa-miR-450a-1-3p
CADM1	1	hsa-miR-126-3p
CAV1	1	hsa-miR-199a-5p
CCL5	1	hsa-miR-98-5p
CCL7	1	hsa-let-7f-5p
CCL8	1	hsa-miR-92a-3p
CCNB1	1	hsa-miR-410-3p
CCNJ	1	hsa-miR-98-5p
CCNT2	1	hsa-miR-142-3p
CCR7	1	hsa-miR-199a-5p
CD1C	1	hsa-miR-381-3p
CD40	1	hsa-miR-503-5p
CD44	1	hsa-miR-199a-5p
CD69	1	hsa-miR-92a-3p
CD82	1	hsa-miR-362-3p
CDC25C	1	hsa-miR-141-3p
CDH11	1	hsa-miR-200c-3p
CDH2	1	hsa-miR-199a-5p
CDKN1C	1	hsa-miR-199a-5p
CDX1	1	hsa-miR-296-5p
CDX2	1	hsa-miR-424-5p
CDYL	1	hsa-miR-141-3p
CFL2	1	hsa-miR-200c-3p
CHUK	1	hsa-miR-98-5p
CLDN1	1	hsa-miR-142-5p
CLOCK	1	hsa-miR-141-3p
CLTC	1	hsa-miR-199a-5p
CNR1	1	hsa-miR-494-3p
CNR2	1	hsa-miR-665
COPS6	1	hsa-let-7f-5p
COPS8	1	hsa-let-7f-5p
CPEB2	1	hsa-miR-92a-3p
CPT1A	1	hsa-miR-370-3p
CRIM1	1	hsa-miR-20b-5p
CSNK2A1	1	hsa-miR-337-3p
CTBP2	1	hsa-miR-141-3p
CTSC	1	hsa-miR-199a-5p
CTTN	1	hsa-miR-542-3p
CUL2	1	hsa-miR-424-5p
CUL5	1	hsa-miR-19b-3p
CX3CR1	1	hsa-miR-296-3p
CXCL2	1	hsa-miR-532-5p
CXCR6	1	hsa-miR-361-5p
DAAM2	1	hsa-miR-335-5p
DDR1	1	hsa-miR-199a-5p
DDX53	1	hsa-miR-200b-3p
DEK	1	hsa-miR-200a-3p
DICER1	1	hsa-miR-154-5p
DLL4	1	hsa-miR-296-5p
DNAJA4	1	hsa-miR-199a-5p
DNAJC3	1	hsa-miR-200c-3p
DOCK6	1	hsa-miR-142-3p
DRAM1	1	hsa-miR-199a-5p
DUSP1	1	hsa-miR-200c-3p
DUSP10	1	hsa-miR-92a-3p
DYRK2	1	hsa-let-7f-5p
E2F2	1	hsa-miR-98-5p
EDNRA	1	hsa-miR-200c-3p
EFEMP1	1	hsa-miR-338-5p
EFNA1	1	hsa-miR-200c-3p
EFNB2	1	hsa-miR-20b-5p
EGFL7	1	hsa-miR-126-3p
EGR2	1	hsa-miR-142-3p
EIF4E	1	hsa-miR-141-3p
ELAVL1	1	hsa-miR-296-5p
ELF2	1	hsa-miR-409-3p
ELF4	1	hsa-let-7f-5p
ELOVL1	1	hsa-miR-196a-5p
EPHB4	1	hsa-miR-20b-5p
EPN2	1	hsa-miR-335-5p
EPSTI1	1	hsa-miR-654-5p
ERBB3	1	hsa-miR-199a-5p
ERCC2	1	hsa-miR-770-5p
ERN1	1	hsa-miR-199a-5p
ERRFI1	1	hsa-miR-200c-3p
ESR2	1	hsa-miR-92a-3p
ETV5	1	hsa-miR-200b-3p
FABP4	1	hsa-miR-369-5p
FANCA	1	hsa-miR-503-5p
FBLN5	1	hsa-miR-200c-3p
FBXO11	1	hsa-miR-543
FERMT2	1	hsa-miR-200b-3p
FGA	1	hsa-miR-409-3p
FGB	1	hsa-miR-409-3p
FGF20	1	hsa-miR-433-3p
FGF8	1	hsa-miR-503-5p
FGG	1	hsa-miR-409-3p
FLOT1	1	hsa-miR-485-5p
FMN2	1	hsa-miR-335-5p
FMNL3	1	hsa-miR-335-5p
FOXC1	1	hsa-miR-495-3p
FOXG1	1	hsa-miR-200b-3p
foxg1a	1	hsa-miR-200a-3p
FOXJ3	1	hsa-miR-494-3p
FOXO3	1	hsa-miR-126-3p
FRAT1	1	hsa-miR-409-3p
FUT4	1	hsa-miR-493-5p
FXN	1	hsa-miR-299-3p
GAB1	1	hsa-miR-409-3p
GADD45A	1	hsa-miR-370-3p
GAP43	1	hsa-miR-363-3p
GBP2	1	hsa-miR-433-3p
GCM1	1	hsa-miR-19b-3p
GDAP1	1	hsa-miR-200a-3p
GOLM1	1	hsa-miR-493-5p
GOLPH3	1	hsa-miR-134-5p
GPR78	1	hsa-miR-199a-5p
GPS1	1	hsa-let-7f-5p
GRM3	1	hsa-miR-487b-3p
GRM4	1	hsa-miR-335-5p
HDAC2	1	hsa-miR-92a-3p
HDAC4	1	hsa-miR-381-3p
HDGF	1	hsa-miR-141-3p
HES1	1	hsa-miR-410-3p
HEY1	1	hsa-miR-410-3p
HGF	1	hsa-miR-200a-3p
HGS	1	hsa-miR-296-5p
HIF3A	1	hsa-miR-485-5p
HIPK2	1	hsa-miR-141-3p
HIVEP1	1	hsa-miR-363-3p
HMOX1	1	hsa-miR-196a-5p
HNF1B	1	hsa-miR-200c-3p
HNF4A	1	hsa-miR-766-3p
HNRNPD	1	hsa-miR-141-3p
HNRNPK	1	hsa-miR-450a-5p
HOTAIR	1	hsa-miR-126-5p
HOXA5	1	hsa-miR-196a-5p
HOXB8	1	hsa-miR-196a-5p
HOXC8	1	hsa-miR-196a-5p
HOXD8	1	hsa-miR-196a-5p
HSPA1B	1	hsa-miR-142-3p
HUWE1	1	hsa-miR-542-5p
ID1	1	hsa-miR-381-3p
ID4	1	hsa-miR-335-5p
IFNG	1	hsa-miR-409-3p
IGF1	1	hsa-miR-98-5p
IGFBP1	1	hsa-miR-542-3p
IGFBP2	1	hsa-miR-126-3p
IKBKE	1	hsa-miR-296-5p
IKZF1	1	hsa-miR-92a-3p
IL10	1	hsa-miR-98-5p
IL11	1	hsa-miR-379-5p
IL1A	1	hsa-miR-142-3p
IL4	1	hsa-miR-429
ILK	1	hsa-miR-542-3p
IRS1	1	hsa-miR-126-3p
ITGA3	1	hsa-miR-199a-5p
ITGA5	1	hsa-miR-92a-3p
ITGB1	1	hsa-miR-134-5p
ITGB3	1	hsa-miR-98-5p
JAG2	1	hsa-miR-410-3p
JAZF1	1	hsa-miR-200c-3p
JUN	1	hsa-miR-200b-3p
JUNB	1	hsa-miR-199a-5p
KCNH1	1	hsa-miR-296-3p
KDM1A	1	hsa-miR-329-3p
KDM5B	1	hsa-miR-424-5p
KIF23	1	hsa-miR-424-5p
KL	1	hsa-miR-199a-5p
KLF12	1	hsa-miR-141-3p
KLF15	1	hsa-miR-376a-3p
KLF2	1	hsa-miR-92a-3p
KLF4	1	hsa-miR-92a-3p
KLF5	1	hsa-miR-141-3p
KLF9	1	hsa-miR-200c-3p
KLK10	1	hsa-let-7f-5p
KLK6	1	hsa-let-7f-5p
KMT5A	1	hsa-miR-127-3p
KREMEN1	1	hsa-miR-431-5p
KRT5	1	hsa-miR-196a-5p
L1CAM	1	hsa-miR-503-3p
LAMTOR5	1	hsa-miR-501-5p
LASP1	1	hsa-miR-92a-3p
LDHA	1	hsa-miR-200b-3p
LDLR	1	hsa-miR-199a-5p
LEPR	1	hsa-miR-200c-3p
LGALS3	1	hsa-miR-424-3p
LGR5	1	hsa-miR-142-3p
LIF	1	hsa-miR-199a-5p
LIMK1	1	hsa-miR-20b-5p
LIN28A	1	hsa-miR-370-3p
LIN7A	1	hsa-miR-199a-5p
LLGL1	1	hsa-miR-652-3p
LOX	1	hsa-miR-200b-3p
LPP	1	hsa-miR-142-3p
LRG1	1	hsa-miR-335-5p
LRP1	1	hsa-miR-338-5p
LRP6	1	hsa-miR-126-3p
LRRC32	1	hsa-miR-142-3p
LSP1	1	hsa-miR-196a-5p
MACC1	1	hsa-miR-200a-3p
MAFB	1	hsa-miR-199a-5p
MAMDC2	1	hsa-miR-196a-5p
MAP2K4	1	hsa-miR-92a-3p
MAP2K7	1	hsa-miR-493-3p
MAP3K11	1	hsa-miR-199a-5p
MAP3K8	1	hsa-miR-370-3p
MAP4K3	1	hsa-miR-199a-5p
MAP4K4	1	hsa-miR-141-3p
MAPK4	1	hsa-miR-127-3p
MAPK7	1	hsa-miR-200b-3p
MAPK8	1	hsa-miR-92a-3p
MAPRE1	1	hsa-miR-92a-3p
MATR3	1	hsa-miR-200b-3p
MCAM	1	hsa-miR-329-3p
MCC	1	hsa-miR-494-3p
MECP2	1	hsa-miR-432-5p
MEIS1	1	hsa-miR-495-3p
MEPE	1	hsa-miR-376a-3p
MFF	1	hsa-miR-200a-3p
MMP13	1	hsa-miR-127-3p
MNX1	1	hsa-miR-200a-3p
MTA1	1	hsa-miR-543
MTA3	1	hsa-miR-495-3p
MTOR	1	hsa-miR-496
MTUS1	1	hsa-miR-19b-3p
MXI1	1	hsa-miR-493-3p
MYCBP2	1	hsa-miR-92a-3p
MYCN	1	hsa-miR-19b-3p
MYH10	1	hsa-miR-200a-3p
MYH2	1	hsa-miR-494-3p
MYH9	1	hsa-let-7f-5p
MYLK	1	hsa-miR-200c-3p
MZF1	1	hsa-miR-337-3p
NANOG	1	hsa-miR-134-5p
NCAM1	1	hsa-miR-200c-3p
NECTIN1	1	hsa-miR-199a-5p
NES	1	hsa-miR-432-5p
NF1	1	hsa-miR-370-3p
NFE2L2	1	hsa-miR-142-5p
NFKB1	1	hsa-miR-199a-5p
NFYB	1	hsa-miR-485-3p
NGFR	1	hsa-miR-296-5p
NLK	1	hsa-miR-409-3p
NOTCH3	1	hsa-miR-136-3p
NR0B2	1	hsa-miR-141-3p
NR1H4	1	hsa-miR-92a-3p
NR5A2	1	hsa-miR-376c-3p
NRP1	1	hsa-miR-338-5p
NRP2	1	hsa-miR-196a-5p
NTF3	1	hsa-miR-200c-3p
NTN4	1	hsa-miR-196a-5p
NTRK2	1	hsa-miR-200c-3p
NTRK3	1	hsa-miR-485-3p
ONECUT2	1	hsa-miR-429
OPRM1	1	hsa-miR-134-5p
OSBPL2	1	hsa-miR-92a-3p
OSBPL8	1	hsa-miR-92a-3p
OSCP1	1	hsa-miR-199a-5p
OSTF1	1	hsa-miR-429
OTUB1	1	hsa-miR-542-3p
OTUD7B	1	hsa-miR-500a-5p
OXR1	1	hsa-miR-200b-3p
P2RX5	1	hsa-miR-381-3p
PAK2	1	hsa-miR-134-5p
PAPPA	1	hsa-miR-141-3p
PARP1	1	hsa-miR-335-5p
PAX6	1	hsa-miR-335-3p
PBRM1	1	hsa-miR-485-3p
PCGF5	1	hsa-miR-92a-3p
PDCD10	1	hsa-miR-200c-3p
PDCD4	1	hsa-miR-200a-3p
PDE4D	1	hsa-miR-199a-5p
PDIA3	1	hsa-miR-494-3p
PDPN	1	hsa-miR-363-3p
PGR	1	hsa-miR-126-3p
PGRMC1	1	hsa-miR-98-5p
PHF10	1	hsa-miR-409-3p
PHLPP2	1	hsa-miR-141-3p
PIAS1	1	hsa-miR-424-5p
PIAS3	1	hsa-miR-199a-5p
PIK3C2B	1	hsa-miR-362-5p
PIK3CD	1	hsa-miR-199a-5p
PIK3CG	1	hsa-miR-126-3p
PIK3R2	1	hsa-miR-126-3p
PIM1	1	hsa-miR-542-3p
PITPNC1	1	hsa-miR-126-3p
PITX1	1	hsa-miR-19b-3p
PKM	1	hsa-miR-369-3p
PKNOX1	1	hsa-miR-19b-3p
PLAG1	1	hsa-miR-424-5p
PLAUR	1	hsa-miR-335-5p
PLK1	1	hsa-miR-296-5p
PLK2	1	hsa-miR-126-3p
PMAIP1	1	hsa-miR-200c-3p
POSTN	1	hsa-let-7f-5p
POU5F1	1	hsa-miR-335-5p
PPARA	1	hsa-miR-141-3p
PPARG	1	hsa-miR-20b-5p
PPM1A	1	hsa-miR-377-3p
PPP2R5E	1	hsa-miR-19b-3p
PRKAA1	1	hsa-miR-19b-3p
PRKCA	1	hsa-miR-142-3p
PRKCZ	1	hsa-miR-200c-3p
PROS1	1	hsa-miR-494-3p
PRPS1	1	hsa-miR-376a-5p
PRRX1	1	hsa-miR-655-3p
PSMD9	1	hsa-miR-199a-5p
PTCH1	1	hsa-miR-424-5p
PTGS2	1	hsa-miR-199a-5p
PTP4A3	1	hsa-miR-495-3p
PTPN1	1	hsa-miR-362-3p
PTPN12	1	hsa-miR-200b-3p
PTPN13	1	hsa-miR-200c-3p
PTPN23	1	hsa-miR-142-3p
PTPRN2	1	hsa-miR-335-5p
PTTG1	1	hsa-miR-655-3p
PUM2	1	hsa-miR-134-5p
QRSL1	1	hsa-miR-200b-3p
RAB18	1	hsa-miR-200b-3p
RAB23	1	hsa-miR-200b-3p
RAB27A	1	hsa-miR-134-5p
RAB3B	1	hsa-miR-200b-3p
RAD21	1	hsa-miR-92a-3p
RAD23B	1	hsa-miR-494-3p
RAP1A	1	hsa-miR-337-3p
RAP2A	1	hsa-miR-376a-5p
RASA1	1	hsa-miR-335-5p
RASAL2	1	hsa-miR-136-5p
RASSF8	1	hsa-miR-429
RB1	1	hsa-miR-335-5p
RB1CC1	1	hsa-miR-20b-5p
RBBP4	1	hsa-miR-429
RCOR1	1	hsa-miR-432-5p
RCOR3	1	hsa-miR-200c-3p
RECK	1	hsa-miR-409-3p
REG4	1	hsa-miR-363-3p
RFFL	1	hsa-miR-92a-3p
RGMA	1	hsa-miR-127-3p
RGS3	1	hsa-miR-126-3p
RGS5	1	hsa-miR-92a-3p
RHOU	1	hsa-miR-126-3p
RND1	1	hsa-miR-199a-5p
RPS23	1	hsa-miR-542-3p
RPS6KB1	1	hsa-miR-200c-3p
S100A9	1	hsa-miR-196a-5p
S100B	1	hsa-miR-296-5p
S1PR1	1	hsa-miR-363-3p
SALL4	1	hsa-miR-98-5p
SCRIB	1	hsa-miR-296-5p
SDC1	1	hsa-miR-494-3p
SERPINB9	1	hsa-miR-127-3p
SET	1	hsa-miR-502-3p
SETD2	1	hsa-miR-199a-5p
SFPQ	1	hsa-miR-141-3p
SFRP1	1	hsa-miR-127-3p
SH2B1	1	hsa-miR-361-3p
SH3PXD2A	1	hsa-miR-200c-3p
SIAH1	1	hsa-miR-424-5p
SIAH2	1	hsa-miR-335-5p
SKI	1	hsa-miR-127-3p
SLC1A2	1	hsa-miR-200c-3p
SLC26A3	1	hsa-miR-494-3p
SLC27A1	1	hsa-miR-199a-5p
SLC31A1	1	hsa-miR-98-5p
SLC40A1	1	hsa-miR-485-3p
SLC7A5	1	hsa-miR-126-3p
SMAD7	1	hsa-miR-424-5p
SMARCA2	1	hsa-miR-199a-5p
SMR3B	1	hsa-miR-495-3p
SND1	1	hsa-miR-361-5p
SNX19	1	hsa-miR-376a-5p
SNX6	1	hsa-miR-98-5p
SOCS2	1	hsa-miR-424-5p
SOCS3	1	hsa-let-7f-5p
SOCS4	1	hsa-miR-98-5p
SOCS5	1	hsa-miR-92a-3p
SOCS6	1	hsa-miR-424-5p
SOD1	1	hsa-miR-377-3p
SOD2	1	hsa-miR-377-3p
SOX17	1	hsa-miR-335-5p
SOX9	1	hsa-miR-495-3p
SPI1	1	hsa-miR-424-5p
SPRED2	1	hsa-miR-487a-3p
SPRR2C	1	hsa-miR-196a-5p
SPRY1	1	hsa-miR-338-5p
SPRY4	1	hsa-miR-411-5p
SRF	1	hsa-miR-200a-3p
SSSCA1	1	hsa-miR-196a-5p
STAT1	1	hsa-miR-450a-5p
STAT4	1	hsa-miR-141-3p
STAT5B	1	hsa-miR-134-5p
STAT6	1	hsa-miR-361-5p
STC2	1	hsa-miR-485-5p
STK3	1	hsa-miR-141-3p
SULT1E1	1	hsa-miR-199a-5p
SYK	1	hsa-miR-532-5p
SYNCRIP	1	hsa-miR-494-3p
TAB2	1	hsa-miR-142-3p
TAX1BP1	1	hsa-miR-500a-5p
TAZ	1	hsa-miR-141-3p
TBK1	1	hsa-miR-200c-3p
TCEAL9	1	hsa-miR-335-5p
TCF4	1	hsa-miR-126-3p
TEK	1	hsa-miR-126-3p
TERT	1	hsa-miR-532-5p
TFCP2	1	hsa-miR-660-5p
TFDP2	1	hsa-miR-141-3p
TFF1	1	hsa-miR-504-5p
TFF2	1	hsa-miR-335-5p
TFPI	1	hsa-miR-494-3p
TGFA	1	hsa-miR-376c-3p
TGFBR3	1	hsa-miR-424-5p
THBS1	1	hsa-miR-487b-3p
THBS4	1	hsa-miR-142-3p
THRB	1	hsa-miR-200a-3p
TIMP1	1	hsa-miR-377-3p
TLR3	1	hsa-miR-758-3p
TLR7	1	hsa-miR-758-3p
TM4SF1	1	hsa-miR-141-3p
TMEM54	1	hsa-miR-199a-5p
TNC	1	hsa-miR-335-5p
TNFAIP3	1	hsa-miR-19b-3p
TNFRSF11A	1	hsa-miR-503-5p
TOM1	1	hsa-miR-126-3p
TP53INP1	1	hsa-miR-142-5p
TP63	1	hsa-miR-92a-3p
TP73-AS1	1	hsa-miR-200a-3p
TRIM29	1	hsa-miR-335-5p
TUBB3	1	hsa-miR-200c-3p
TUG1	1	hsa-miR-335-5p
TUSC2	1	hsa-miR-98-5p
TWF1	1	hsa-miR-126-3p
TWF2	1	hsa-miR-126-3p
UBAP1	1	hsa-miR-141-3p
UBASH3B	1	hsa-miR-200a-3p
UBE2F	1	hsa-miR-335-5p
UBE2I	1	hsa-miR-200c-3p
UBQLN1	1	hsa-miR-200c-3p
UGT2B15	1	hsa-miR-376c-3p
UNG	1	hsa-miR-199a-5p
USF2	1	hsa-miR-362-3p
USP13	1	hsa-miR-539-3p
USP25	1	hsa-miR-200c-3p
VCAM1	1	hsa-miR-126-3p
VIM	1	hsa-miR-134-5p
WNK4	1	hsa-miR-296-5p
WNT1	1	hsa-miR-200b-3p
WNT2	1	hsa-miR-199a-5p
XBP1	1	hsa-miR-127-3p
XRCC3	1	hsa-miR-127-3p
YBX1	1	hsa-miR-382-5p
YWHAG	1	hsa-miR-141-3p
ZDHHC9	1	hsa-miR-134-5p
ZFPM1	1	hsa-miR-200c-3p
ZMPSTE24	1	hsa-miR-141-3p
ZNF217	1	hsa-miR-200c-3p
ZNF513	1	hsa-miR-376a-5p
ZWINT	1	hsa-miR-127-3p
